# Supplementary material
Source: Research Square preprint supplement (doi:10.21203/rs.3.rs-9266461/v1)
Supplement: Supplementary file 1 [file 1b6127fe36eed9e87d76f1be.docx]

## Lactylation Dynamics in Myxozoan Proteins

Amr A. G. Ibrahim, Juliana Naldoni, Antônio A. M. Maia, Juliano R. Sangalli, Caroline M. Meira, Rayline T. A. Figueredo, Beth Okamura, Paul F. Long, Edson A. Adriano

# Supplementary File S2

# Material and methods of the western blotting analysis of Histone Lactylation in *Myxobolus macroplasmodialis*

**Sample collection**

*Myxobolus macroplasmodialis* plasmodium used for western blotting analysis was recovered from a specimen of the fish *Salminus brasiliensis* (Bryconidae) caught in the Mogi-Guaçu River, São Paulo State, Brazil (21°55′18″S, 47°20′35″W). Sampling and access to genetic heritage were conducted in accordance with the authorization granted by the Brazilian Ministry of the Environment (SISBIO authorization #67616-8 and SisGen registration #A656D), and the methodology was approved by the Ethics Committee on Animal Use of the Federal University of São Paulo (UNIFESP) (CEUA #7344040422).

**Protein extraction from the parasite**

After dissection, plasmodia of *M. macroplasmodialis* were removed and preserved in liquid nitrogen. One plasmodium was disrupted, and the content collected, washed in PBS, transferred to a 1.5 mL tube, and flash-frozen in liquid nitrogen. Proteins were extracted by adding 1 mL of RIPA buffer supplemented with 5 mM sodium butyrate and protease inhibitor cocktail (Roche) directly to the tube, followed by grinding using the TissueRuptor (Qiagen) for 1 minute. The sample was kept lysing on ice for 2 hours to allow the proteins to solubilize, then centrifuged at 10,000 xg for 10 minutes to precipitate insoluble proteins. Supernatant was recovered and transferred to a new vial. Protein was quantified using Qubit 4.0 and stored in aliquots at -80 °C.

**Acid extraction of histones from the parasite**

Histones were extracted by grinding the parasite using the TissueRuptor (Qiagen) for 30 seconds in PBS + 0.5 % Triton X-100 + 5mM sodium butyrate + protein inhibitor cocktail (Roche) on ice. Lysates were kept on ice for 10 minutes to complete the lysis of the cells. Nuclei were pelleted by centrifuging the lysate for 1 minute at 10,000 xg. The supernatant was discarded, and the pellet containing nuclei was resuspended in 400 microliters of 0.2 N HCl overnight on ice to extract the histones. The following day, the sample was centrifuged at 10,000 xg for 1 minute to precipitate any insoluble molecules. The supernatant containing acid-soluble proteins was collected, transferred to a new microcentrifuge tube, and neutralized with 40 microliters of 2N NaOH. The proteins were quantified by Qubit 4.0 (Life Technologies) and stored in aliquots at -80 °C.

**Coomassie staining**

Whole cell lysate: 90 micrograms of cell lysate were mixed with 4× Laemmli buffer (Bio Rad Laboratories, Hercules, CA, USA cat. #161-0747), denatured at 98 °C for 5 min, and loaded into a 4%-15% precast gel (BioRad cat# 456-1086) and run at a constant 100 V for 90 min. The gel was fixed in 40% ethanol / 10% Acetic acid for 15 minutes, washed 3 times in ultra-pure water, and stained with QC Colloidal Coomassie Stain (Bio Rad cat #1610803) for 20 h at RT. The next day, the gel was washed for 3 h in ultrapure water to remove the background. The gel image was captured on a ChemiDoc MP Imaging System (Bio-Rad), and the enrichment of histones was confirmed.

Histones: To stain the histones, we used the same protocol as described above, except we loaded 10 micrograms of acid-extracted histones, and they were separated for 160 minutes in a home-made 4%-15% SDS-PAGE.

**Western blot in parasite**

The proteins were prepared and fractionated as described above. For the whole cell lysate, after electrophoresis, proteins were transferred to a PVDF membrane using a semi-dry transfer system (TransBlot Turbo Bio-Rad) using a transfer pack (Bio-Rad cat# 170-4156). For the acid-extracted histones, proteins were transferred to a PVDF membrane (Bio-Rad) at a constant 80 V for 120 minutes using a wet transfer system (Bio-Rad). After transfer, the membranes were blocked for 1 h at room temperature (RT) using a 5% nonfat-dried milk solution in Tris-buffered saline with 0.1% Tween-20 detergent (TBS-T). The antibodies were added directly to the blocking solution, and the membranes were incubated overnight at 4 °C under agitation. The next day, the membranes were washed 5 times for 3 min in TBS-T solution and incubated for 1h at RT with HRP-conjugated anti-rabbit secondary antibody (Sigma cat# A0545; diluted 1:5000). Membranes were washed 5x for 3 min, and proteins were detected through incubation with Clarity ECL substrate (Bio-Rad cat# 170-5060). Images were taken in the ChemiDoc MP imaging system (Bio-Rad). Western blotting was performed using antibodies against pan-lactyl-lysine, total histone H3, H3K18la, and H3K9ac.
