# Supplementary material
Source: Research Square preprint supplement (doi:10.21203/rs.3.rs-9266461/v1)
Supplement: Supplementary file 2 [file 2b1b45c585df64e0e1d2745a.xlsx]

## Sheet: Lactylation_Data
		Lactylation Dynamics in Myxozoan Proteins
								Amr A. G. Ibrahim, Juliana Naldoni, Antônio A. M. Maia, Juliano R. Sangalli, Caroline M. Meira, Rayline T. A. Figueredo, Beth Okamura, Paul F. Long, Edson A. Adriano
				Supplementary Table S1 - The Lactylation results of lactylation from Myxobolus macroplasmodialis - Excel table lists all lactylated proteins identified by JEAN
sequence_id	position	residue	context	lactylation_score	predicted_lactylation	sequence_length	Current_Range_pA	Time_Range_s
cd77ecbd-15b8-4ec3-8f61-be6d30e14d11_frame_1	8	K	*FIY*IQKFYYFLRTDKN	0.25	FALSE	79	-22.1706	225.996
cd77ecbd-15b8-4ec3-8f61-be6d30e14d11_frame_1	17	K	QKFYYFLRTDKNIVFKDSEHL	0.561905	TRUE	79	-37.8643	119.8
cd77ecbd-15b8-4ec3-8f61-be6d30e14d11_frame_1	22	K	FLRTDKNIVFKDSEHLFNV*L	0.561905	TRUE	79	-18.9184	169.813
cd77ecbd-15b8-4ec3-8f61-be6d30e14d11_frame_1	51	K	LFL*CFHAILKIHFYYNKNII	0.152381	FALSE	79	-26.8981	171.346
cd77ecbd-15b8-4ec3-8f61-be6d30e14d11_frame_1	58	K	AILKIHFYYNKNIISNIVFY*	0.202381	FALSE	79	-18.3886	252.367
cd77ecbd-15b8-4ec3-8f61-be6d30e14d11_frame_1	70	K	IISNIVFY*TKYNIRMFEII	0.21	FALSE	79	-24.1611	113.201
cd77ecbd-15b8-4ec3-8f61-be6d30e14d11_frame_2	5	K	NLYIKFKNFIIF*EL	0.273333	FALSE	79	-12.2015	195.584
cd77ecbd-15b8-4ec3-8f61-be6d30e14d11_frame_2	7	K	NLYIKFKNFIIF*ELIK	0.288235	FALSE	79	-35.029	162.708
cd77ecbd-15b8-4ec3-8f61-be6d30e14d11_frame_2	17	K	KNFIIF*ELIKILFLRIPNIY	0.290476	FALSE	79	-34.8085	164.23
cd77ecbd-15b8-4ec3-8f61-be6d30e14d11_frame_2	51	K	CFYNVSMRY*KYIFIITKTLF	0.161905	FALSE	79	-12.0365	156.101
cd77ecbd-15b8-4ec3-8f61-be6d30e14d11_frame_2	58	K	RY*KYIFIITKTLFQTLFFIK	0.240476	FALSE	79	-33.8874	293.012
cd77ecbd-15b8-4ec3-8f61-be6d30e14d11_frame_2	68	K	KTLFQTLFFIKQNIIYECLR*	0.216667	FALSE	79	-18.202	181.629
cd77ecbd-15b8-4ec3-8f61-be6d30e14d11_frame_3	7	K	IYILNSKILLFFKN**K	0.282353	FALSE	78	-13.0207	282.585
cd77ecbd-15b8-4ec3-8f61-be6d30e14d11_frame_3	13	K	ILNSKILLFFKN**KYCF*GF	0.257143	FALSE	78	-48.0449	148.678
cd77ecbd-15b8-4ec3-8f61-be6d30e14d11_frame_3	17	K	KILLFFKN**KYCF*GFRTFI	0.271429	FALSE	78	-34.4678	236.776
cd77ecbd-15b8-4ec3-8f61-be6d30e14d11_frame_3	50	K	FVFIMFPCDIKNTFLL*QKHY	0.157143	FALSE	78	-47.5559	106.055
cd77ecbd-15b8-4ec3-8f61-be6d30e14d11_frame_3	58	K	DIKNTFLL*QKHYFKHCFLLN	0.502381	TRUE	78	-30.2945	228.969
cd77ecbd-15b8-4ec3-8f61-be6d30e14d11_frame_3	62	K	TFLL*QKHYFKHCFLLNKI*Y	0.497619	FALSE	78	-41.3459	138.558
cd77ecbd-15b8-4ec3-8f61-be6d30e14d11_frame_3	69	K	HYFKHCFLLNKI*YTNV*DN	0.17	FALSE	78	-31.5621	158.973
cd77ecbd-15b8-4ec3-8f61-be6d30e14d11_frame_4	14	K	QTFVYYILFNKKQCLK*CFCY	0.842857	TRUE	79	-15.5461	167.508
cd77ecbd-15b8-4ec3-8f61-be6d30e14d11_frame_4	15	K	TFVYYILFNKKQCLK*CFCYN	0.842857	TRUE	79	-35.2217	296.697
cd77ecbd-15b8-4ec3-8f61-be6d30e14d11_frame_4	19	K	YILFNKKQCLK*CFCYNKNVF	0.561905	TRUE	79	-21.19	217.267
cd77ecbd-15b8-4ec3-8f61-be6d30e14d11_frame_4	26	K	QCLK*CFCYNKNVFLISHGNI	0.128571	FALSE	79	-40.0518	159.541
cd77ecbd-15b8-4ec3-8f61-be6d30e14d11_frame_4	38	K	VFLISHGNIIKTKYCI*TNII	0.147619	FALSE	79	-17.1163	213.777
cd77ecbd-15b8-4ec3-8f61-be6d30e14d11_frame_4	40	K	LISHGNIIKTKYCI*TNIIIR	0.157143	FALSE	79	-16.8107	161.715
cd77ecbd-15b8-4ec3-8f61-be6d30e14d11_frame_4	60	K	RR*INVRNP*KQYFYQFLKNN	0.230952	FALSE	79	-13.7336	186.858
cd77ecbd-15b8-4ec3-8f61-be6d30e14d11_frame_4	68	K	P*KQYFYQFLKNNKIFEFNI*	0.507143	TRUE	79	-17.4112	139.712
cd77ecbd-15b8-4ec3-8f61-be6d30e14d11_frame_4	71	K	QYFYQFLKNNKIFEFNI*I	0.502632	TRUE	79	-45.4672	246.753
cd77ecbd-15b8-4ec3-8f61-be6d30e14d11_frame_5	4	K	NYLKHSYIIFCLIK	0.257143	FALSE	79	-34.9279	246.637
cd77ecbd-15b8-4ec3-8f61-be6d30e14d11_frame_5	14	K	KHSYIIFCLIKNNV*NNVFVI	0.257143	FALSE	79	-41.9256	206.745
cd77ecbd-15b8-4ec3-8f61-be6d30e14d11_frame_5	26	K	NV*NNVFVIIKMYF*YRMETL	0.152381	FALSE	79	-48.1385	132.153
cd77ecbd-15b8-4ec3-8f61-be6d30e14d11_frame_5	38	K	YF*YRMETL*KQNIVYKLT**	0.133333	FALSE	79	-35.2413	127.713
cd77ecbd-15b8-4ec3-8f61-be6d30e14d11_frame_5	44	K	ETL*KQNIVYKLT**LDVE*M	0.12381	FALSE	79	-13.6998	124.59
cd77ecbd-15b8-4ec3-8f61-be6d30e14d11_frame_5	59	K	LDVE*MFGILKNNIFISS*KI	0.202381	FALSE	79	-46.2032	272.036
cd77ecbd-15b8-4ec3-8f61-be6d30e14d11_frame_5	68	K	LKNNIFISS*KIIKFLNLIYK	0.545238	TRUE	79	-18.3136	189.849
cd77ecbd-15b8-4ec3-8f61-be6d30e14d11_frame_5	71	K	NIFISS*KIIKFLNLIYKL	0.539474	TRUE	79	-15.4365	129.648
cd77ecbd-15b8-4ec3-8f61-be6d30e14d11_frame_5	78	K	KIIKFLNLIYKL	0.275	FALSE	79	-32.5911	101.598
cd77ecbd-15b8-4ec3-8f61-be6d30e14d11_frame_6	14	K	NIRILYFV**KTMFEIMFLL*	0.261905	FALSE	78	-48.484	217.698
cd77ecbd-15b8-4ec3-8f61-be6d30e14d11_frame_6	26	K	MFEIMFLL**KCIFNIAWKHY	0.157143	FALSE	78	-17.3529	110.916
cd77ecbd-15b8-4ec3-8f61-be6d30e14d11_frame_6	34	K	**KCIFNIAWKHYKNKILYIN	0.466667	FALSE	78	-14.5205	203.499
cd77ecbd-15b8-4ec3-8f61-be6d30e14d11_frame_6	37	K	CIFNIAWKHYKNKILYIN*HN	0.452381	FALSE	78	-15.1181	176.895
cd77ecbd-15b8-4ec3-8f61-be6d30e14d11_frame_6	39	K	FNIAWKHYKNKILYIN*HNN*	0.447619	FALSE	78	-33.8057	123.075
cd77ecbd-15b8-4ec3-8f61-be6d30e14d11_frame_6	53	K	IN*HNN*TLNKCSESLKTIFL	0.133333	FALSE	78	-46.9594	157.396
cd77ecbd-15b8-4ec3-8f61-be6d30e14d11_frame_6	59	K	*TLNKCSESLKTIFLSVLKK*	0.221429	FALSE	78	-18.9504	270.501
cd77ecbd-15b8-4ec3-8f61-be6d30e14d11_frame_6	67	K	SLKTIFLSVLKK**NF*I*YI	0.511905	TRUE	78	-47.4213	283.709
cd77ecbd-15b8-4ec3-8f61-be6d30e14d11_frame_6	68	K	LKTIFLSVLKK**NF*I*YIN	0.511905	TRUE	78	-25.6575	162.143
dc98fa04-efae-45e8-a500-c8674809e30b_frame_1	13	K	*LEDVSLFIYKE*NFLKKCCF	0.242857	FALSE	74	-47.9567	150.415
dc98fa04-efae-45e8-a500-c8674809e30b_frame_1	19	K	LFIYKE*NFLKKCCF*QKKYF	0.571429	TRUE	74	-30.7803	261.158
dc98fa04-efae-45e8-a500-c8674809e30b_frame_1	20	K	FIYKE*NFLKKCCF*QKKYFI	0.571429	TRUE	74	-16.7291	111.525
dc98fa04-efae-45e8-a500-c8674809e30b_frame_1	26	K	NFLKKCCF*QKKYFIRI*NIN	0.180952	FALSE	74	-13.8299	252.807
dc98fa04-efae-45e8-a500-c8674809e30b_frame_1	27	K	FLKKCCF*QKKYFIRI*NINQ	0.180952	FALSE	74	-46.1738	172.143
dc98fa04-efae-45e8-a500-c8674809e30b_frame_2	5	K	NINWKMYLYLFTKNK	0.286667	FALSE	74	-16.726	150.932
dc98fa04-efae-45e8-a500-c8674809e30b_frame_2	13	K	NWKMYLYLFTKNKTF*KNAVF	0.285714	FALSE	74	-19.7121	247.161
dc98fa04-efae-45e8-a500-c8674809e30b_frame_2	15	K	KMYLYLFTKNKTF*KNAVFNR	0.295238	FALSE	74	-27.041	124.688
dc98fa04-efae-45e8-a500-c8674809e30b_frame_2	19	K	YLFTKNKTF*KNAVFNRRNIL	0.3	FALSE	74	-47.6974	233.225
dc98fa04-efae-45e8-a500-c8674809e30b_frame_2	33	K	FNRRNILLEYKTSTKVLAVPQ	0.490476	FALSE	74	-21.2923	123.496
dc98fa04-efae-45e8-a500-c8674809e30b_frame_2	37	K	NILLEYKTSTKVLAVPQLSK*	0.471429	FALSE	74	-18.0045	243.584
dc98fa04-efae-45e8-a500-c8674809e30b_frame_2	46	K	TKVLAVPQLSK*LTLAIRSVM	0.195238	FALSE	74	-30.0903	231.845
dc98fa04-efae-45e8-a500-c8674809e30b_frame_2	69	K	YMYLVQLRIAKVLTTY	0.21875	FALSE	74	-49.839	265.373
dc98fa04-efae-45e8-a500-c8674809e30b_frame_3	15	K	RCIFIYLQRIKLFKKMLFLTE	0.909524	TRUE	73	-28.1895	225.03
dc98fa04-efae-45e8-a500-c8674809e30b_frame_3	18	K	FIYLQRIKLFKKMLFLTEEIF	0.9	TRUE	73	-44.8277	280.126
dc98fa04-efae-45e8-a500-c8674809e30b_frame_3	19	K	IYLQRIKLFKKMLFLTEEIFY	0.890476	TRUE	73	-29.0957	195.119
dc98fa04-efae-45e8-a500-c8674809e30b_frame_3	33	K	LTEEIFY*NIKHQPRCWQSLS	0.133333	FALSE	73	-26.6992	154.708
dc98fa04-efae-45e8-a500-c8674809e30b_frame_4	18	K	NT*LNQVHVHKHNATYC*G*L	0.195238	FALSE	74	-32.7204	245.832
dc98fa04-efae-45e8-a500-c8674809e30b_frame_4	31	K	ATYC*G*LLTKLRDCQHLG*C	0.1	FALSE	74	-16.6101	167.829
dc98fa04-efae-45e8-a500-c8674809e30b_frame_4	52	K	FIF**NISSVKNSIFLKSFIL	0.171429	FALSE	74	-24.5816	248.88
dc98fa04-efae-45e8-a500-c8674809e30b_frame_4	58	K	ISSVKNSIFLKSFILCK*IKI	0.245238	FALSE	74	-18.6288	247.024
dc98fa04-efae-45e8-a500-c8674809e30b_frame_4	64	K	SIFLKSFILCK*IKIHLPVNI	0.235714	FALSE	74	-49.9427	268.96
dc98fa04-efae-45e8-a500-c8674809e30b_frame_4	67	K	LKSFILCK*IKIHLPVNI	0.238889	FALSE	74	-14.201	148.055
dc98fa04-efae-45e8-a500-c8674809e30b_frame_5	13	K	VRTLAIRN*TKYMYINITLRI	0.285714	FALSE	74	-18.9897	171.986
dc98fa04-efae-45e8-a500-c8674809e30b_frame_5	25	K	MYINITLRIAKVNYLLS*GTA	0.157143	FALSE	74	-46.5913	262.828
dc98fa04-efae-45e8-a500-c8674809e30b_frame_5	46	K	STLVDVLYSNKIFLLLKTAFF	0.17619	FALSE	74	-17.248	165.946
dc98fa04-efae-45e8-a500-c8674809e30b_frame_5	52	K	LYSNKIFLLLKTAFF*KVLFF	0.195238	FALSE	74	-39.5925	144.073
dc98fa04-efae-45e8-a500-c8674809e30b_frame_5	58	K	FLLLKTAFF*KVLFFVNK*RY	0.25	FALSE	74	-33.6778	139.376
dc98fa04-efae-45e8-a500-c8674809e30b_frame_5	65	K	FF*KVLFFVNK*RYIFQLIL	0.24	FALSE	74	-25.749	181.021
dc98fa04-efae-45e8-a500-c8674809e30b_frame_6	1	K	K*LEP*QYVTE	0.209091	FALSE	73	-45.2952	159.573
dc98fa04-efae-45e8-a500-c8674809e30b_frame_6	46	K	APWLMFYILIKYFFC*KQHFF	0.166667	FALSE	73	-16.9728	238.24
dc98fa04-efae-45e8-a500-c8674809e30b_frame_6	52	K	YILIKYFFC*KQHFFKKFYSL	0.471429	FALSE	73	-29.7663	106.989
dc98fa04-efae-45e8-a500-c8674809e30b_frame_6	57	K	YFFC*KQHFFKKFYSL*INKD	0.807143	TRUE	73	-32.2685	202.624
dc98fa04-efae-45e8-a500-c8674809e30b_frame_6	58	K	FFC*KQHFFKKFYSL*INKDT	0.511905	TRUE	73	-42.5484	175.171
dc98fa04-efae-45e8-a500-c8674809e30b_frame_6	66	K	FKKFYSL*INKDTSSS*Y	0.194444	FALSE	73	-12.6096	161.722
adccf803-caaa-4e00-9f1c-08a606b5f395_frame_1	6	K	*YSFLKNVKTIIDIFC	0.55625	TRUE	51	-18.209	214.308
adccf803-caaa-4e00-9f1c-08a606b5f395_frame_1	9	K	*YSFLKNVKTIIDIFCFFK	0.573684	TRUE	51	-18.5688	267.742
adccf803-caaa-4e00-9f1c-08a606b5f395_frame_1	19	K	KTIIDIFCFFKDSFTRDYKCS	0.161905	FALSE	51	-33.0332	141.435
adccf803-caaa-4e00-9f1c-08a606b5f395_frame_1	27	K	FFKDSFTRDYKCSKRLSDEKE	0.771429	TRUE	51	-20.8227	196.782
adccf803-caaa-4e00-9f1c-08a606b5f395_frame_1	30	K	DSFTRDYKCSKRLSDEKEFKV	0.771429	TRUE	51	-36.3708	119.437
adccf803-caaa-4e00-9f1c-08a606b5f395_frame_1	36	K	YKCSKRLSDEKEFKVLAVPQL	0.485714	FALSE	51	-32.6465	150.041
adccf803-caaa-4e00-9f1c-08a606b5f395_frame_1	39	K	SKRLSDEKEFKVLAVPQLRE*	0.535714	TRUE	51	-29.1768	192.751
adccf803-caaa-4e00-9f1c-08a606b5f395_frame_2	9	K	NILF*RMLKL*LISFAFLR	0.3	FALSE	51	-39.0509	163.111
adccf803-caaa-4e00-9f1c-08a606b5f395_frame_2	35	K	IINVRND*ATKKNLRCWQSLS	0.47619	FALSE	51	-37.3759	238.854
adccf803-caaa-4e00-9f1c-08a606b5f395_frame_2	36	K	INVRND*ATKKNLRCWQSLSF	0.47619	FALSE	51	-19.9574	250.107
adccf803-caaa-4e00-9f1c-08a606b5f395_frame_3	32	K	YARL*MFETIKRRKRI*GAGS	1	TRUE	51	-21.3576	255.362
adccf803-caaa-4e00-9f1c-08a606b5f395_frame_3	35	K	L*MFETIKRRKRI*GAGSPSA	1	TRUE	51	-18.1836	262.735
adccf803-caaa-4e00-9f1c-08a606b5f395_frame_4	35	K	HL*SRVNESLKKQKISIIVLT	0.780952	TRUE	51	-44.8884	265.78
adccf803-caaa-4e00-9f1c-08a606b5f395_frame_4	36	K	L*SRVNESLKKQKISIIVLTF	0.790476	TRUE	51	-16.3607	156.341
adccf803-caaa-4e00-9f1c-08a606b5f395_frame_4	38	K	SRVNESLKKQKISIIVLTFFK	0.859524	TRUE	51	-39.5386	169.971
adccf803-caaa-4e00-9f1c-08a606b5f395_frame_4	48	K	KISIIVLTFFKKEY	0.55	TRUE	51	-19.6255	129.909
adccf803-caaa-4e00-9f1c-08a606b5f395_frame_4	49	K	ISIIVLTFFKKEY	0.534615	TRUE	51	-25.6123	162.343
adccf803-caaa-4e00-9f1c-08a606b5f395_frame_5	35	K	IYNRA*MNP*KSKRYQL*F*H	0.452381	FALSE	51	-40.2417	251.65
adccf803-caaa-4e00-9f1c-08a606b5f395_frame_5	37	K	NRA*MNP*KSKRYQL*F*HSS	0.502381	TRUE	51	-26.0186	210.89
adccf803-caaa-4e00-9f1c-08a606b5f395_frame_5	48	K	RYQL*F*HSSKKNI	0.507143	TRUE	51	-40.7565	183.138
adccf803-caaa-4e00-9f1c-08a606b5f395_frame_5	49	K	YQL*F*HSSKKNI	0.488462	FALSE	51	-12.6728	162.824
adccf803-caaa-4e00-9f1c-08a606b5f395_frame_6	6	K	ITLLTKLRDCQHLKFF	0.28125	FALSE	51	-39.4434	203.338
adccf803-caaa-4e00-9f1c-08a606b5f395_frame_6	14	K	LTKLRDCQHLKFFFVA*SFRT	0.280952	FALSE	51	-19.3704	270.819
adccf803-caaa-4e00-9f1c-08a606b5f395_frame_6	30	K	*SFRTFIIARK*ILKKAKDIN	0.514286	TRUE	51	-43.777	176.074
adccf803-caaa-4e00-9f1c-08a606b5f395_frame_6	34	K	TFIIARK*ILKKAKDINYSFN	0.8	TRUE	51	-22.2004	216.237
adccf803-caaa-4e00-9f1c-08a606b5f395_frame_6	35	K	FIIARK*ILKKAKDINYSFNI	0.804762	TRUE	51	-36.9482	222.01
adccf803-caaa-4e00-9f1c-08a606b5f395_frame_6	37	K	IARK*ILKKAKDINYSFNILQ	0.85	TRUE	51	-30.6247	178.656
adccf803-caaa-4e00-9f1c-08a606b5f395_frame_6	48	K	DINYSFNILQKRIL	0.521429	TRUE	51	-20.9888	224.399
ca5b1540-b80b-41a0-b6e3-ada3569d59c4_frame_1	9	K	*RE*RHFFKNIIIILNK*Y	0.268421	FALSE	83	-34.1113	209.019
ca5b1540-b80b-41a0-b6e3-ada3569d59c4_frame_1	17	K	FFKNIIIILNK*YLLIFAILK	0.3	FALSE	83	-19.4417	248.663
ca5b1540-b80b-41a0-b6e3-ada3569d59c4_frame_1	27	K	K*YLLIFAILKSQNCHFCSFC	0.142857	FALSE	83	-33.1078	104.93
ca5b1540-b80b-41a0-b6e3-ada3569d59c4_frame_1	50	K	VQVLAVPQLRK*FFFFFFFFF	0.2	FALSE	83	-38.8534	256.549
ca5b1540-b80b-41a0-b6e3-ada3569d59c4_frame_2	9	K	EGNRGISSKILSLY*TNSI	0.231579	FALSE	83	-35.2189	190.108
ca5b1540-b80b-41a0-b6e3-ada3569d59c4_frame_2	27	K	NSIF*YSQY*KAKTVIFVHFV	0.147619	FALSE	83	-15.0596	156.579
ca5b1540-b80b-41a0-b6e3-ada3569d59c4_frame_2	29	K	IF*YSQY*KAKTVIFVHFVQR	0.161905	FALSE	83	-43.4645	212.866
ca5b1540-b80b-41a0-b6e3-ada3569d59c4_frame_3	1	K	KGIEAFLQKYY	0.254545	FALSE	82	-27.5224	296.663
ca5b1540-b80b-41a0-b6e3-ada3569d59c4_frame_3	9	K	KGIEAFLQKYYHYTKQIVS	0.247368	FALSE	82	-27.656	289.103
ca5b1540-b80b-41a0-b6e3-ada3569d59c4_frame_3	15	K	AFLQKYYHYTKQIVSFNIRNI	0.261905	FALSE	82	-40.6437	201.043
ca5b1540-b80b-41a0-b6e3-ada3569d59c4_frame_3	26	K	QIVSFNIRNIKKPKLSFLFIL	0.814286	TRUE	82	-45.6113	171.277
ca5b1540-b80b-41a0-b6e3-ada3569d59c4_frame_3	27	K	IVSFNIRNIKKPKLSFLFILY	0.809524	TRUE	82	-46.239	151.678
ca5b1540-b80b-41a0-b6e3-ada3569d59c4_frame_3	29	K	SFNIRNIKKPKLSFLFILYNG	0.795238	TRUE	82	-46.3395	199.365
ca5b1540-b80b-41a0-b6e3-ada3569d59c4_frame_4	1	K	KKKKKKKKKKK	1	TRUE	83	-45.4816	251.998
ca5b1540-b80b-41a0-b6e3-ada3569d59c4_frame_4	2	K	KKKKKKKKKKKK	1	TRUE	83	-37.2483	126.16
ca5b1540-b80b-41a0-b6e3-ada3569d59c4_frame_4	3	K	KKKKKKKKKKKKK	1	TRUE	83	-42.8259	152.108
ca5b1540-b80b-41a0-b6e3-ada3569d59c4_frame_4	4	K	KKKKKKKKKKKKKK	1	TRUE	83	-16.7698	181.225
ca5b1540-b80b-41a0-b6e3-ada3569d59c4_frame_4	5	K	KKKKKKKKKKKKKKK	1	TRUE	83	-45.1829	191.035
ca5b1540-b80b-41a0-b6e3-ada3569d59c4_frame_4	6	K	KKKKKKKKKKKKKKKK	1	TRUE	83	-18.6109	207.052
ca5b1540-b80b-41a0-b6e3-ada3569d59c4_frame_4	7	K	KKKKKKKKKKKKKKKKK	1	TRUE	83	-12.2281	221.134
ca5b1540-b80b-41a0-b6e3-ada3569d59c4_frame_4	8	K	KKKKKKKKKKKKKKKKKK	1	TRUE	83	-40.3275	270.426
ca5b1540-b80b-41a0-b6e3-ada3569d59c4_frame_4	9	K	KKKKKKKKKKKKKKKKKKK	1	TRUE	83	-35.8069	255.866
ca5b1540-b80b-41a0-b6e3-ada3569d59c4_frame_4	10	K	KKKKKKKKKKKKKKKKKKKK	1	TRUE	83	-23.9259	277.576
ca5b1540-b80b-41a0-b6e3-ada3569d59c4_frame_4	11	K	KKKKKKKKKKKKKKKKKKKKK	1	TRUE	83	-36.5677	222.726
ca5b1540-b80b-41a0-b6e3-ada3569d59c4_frame_4	12	K	KKKKKKKKKKKKKKKKKKKKK	1	TRUE	83	-49.2751	121.241
ca5b1540-b80b-41a0-b6e3-ada3569d59c4_frame_4	13	K	KKKKKKKKKKKKKKKKKKKKK	1	TRUE	83	-20.0456	293.314
ca5b1540-b80b-41a0-b6e3-ada3569d59c4_frame_4	14	K	KKKKKKKKKKKKKKKKKKKKK	1	TRUE	83	-47.7461	174.806
ca5b1540-b80b-41a0-b6e3-ada3569d59c4_frame_4	15	K	KKKKKKKKKKKKKKKKKKKKK	1	TRUE	83	-33.0482	133.609
ca5b1540-b80b-41a0-b6e3-ada3569d59c4_frame_4	16	K	KKKKKKKKKKKKKKKKKKKKK	1	TRUE	83	-31.9285	136.193
ca5b1540-b80b-41a0-b6e3-ada3569d59c4_frame_4	17	K	KKKKKKKKKKKKKKKKKKKKK	1	TRUE	83	-31.1241	101.768
ca5b1540-b80b-41a0-b6e3-ada3569d59c4_frame_4	18	K	KKKKKKKKKKKKKKKKKKKKK	1	TRUE	83	-39.4385	196.783
ca5b1540-b80b-41a0-b6e3-ada3569d59c4_frame_4	19	K	KKKKKKKKKKKKKKKKKKKKK	1	TRUE	83	-13.6438	261.791
ca5b1540-b80b-41a0-b6e3-ada3569d59c4_frame_4	20	K	KKKKKKKKKKKKKKKKKKKKK	1	TRUE	83	-43.3302	160.854
ca5b1540-b80b-41a0-b6e3-ada3569d59c4_frame_4	21	K	KKKKKKKKKKKKKKKKKKKKK	1	TRUE	83	-31.8207	243.334
ca5b1540-b80b-41a0-b6e3-ada3569d59c4_frame_4	22	K	KKKKKKKKKKKKKKKKKKKKK	1	TRUE	83	-20.8918	242.689
ca5b1540-b80b-41a0-b6e3-ada3569d59c4_frame_4	23	K	KKKKKKKKKKKKKKKKKKKKT	1	TRUE	83	-46.5885	146.3
ca5b1540-b80b-41a0-b6e3-ada3569d59c4_frame_4	24	K	KKKKKKKKKKKKKKKKKKKTT	1	TRUE	83	-13.2366	170.066
ca5b1540-b80b-41a0-b6e3-ada3569d59c4_frame_4	25	K	KKKKKKKKKKKKKKKKKKTTY	1	TRUE	83	-25.8262	187.22
ca5b1540-b80b-41a0-b6e3-ada3569d59c4_frame_4	26	K	KKKKKKKKKKKKKKKKKTTYE	1	TRUE	83	-25.8672	236.873
ca5b1540-b80b-41a0-b6e3-ada3569d59c4_frame_4	27	K	KKKKKKKKKKKKKKKKTTYEA	1	TRUE	83	-39.6111	198.94
ca5b1540-b80b-41a0-b6e3-ada3569d59c4_frame_4	28	K	KKKKKKKKKKKKKKKTTYEAE	1	TRUE	83	-45.7094	221.132
ca5b1540-b80b-41a0-b6e3-ada3569d59c4_frame_4	29	K	KKKKKKKKKKKKKKTTYEAEG	1	TRUE	83	-49.8786	200.216
ca5b1540-b80b-41a0-b6e3-ada3569d59c4_frame_4	30	K	KKKKKKKKKKKKKTTYEAEGL	1	TRUE	83	-17.6751	138.023
ca5b1540-b80b-41a0-b6e3-ada3569d59c4_frame_4	31	K	KKKKKKKKKKKKTTYEAEGLP	1	TRUE	83	-22.8933	195.005
ca5b1540-b80b-41a0-b6e3-ada3569d59c4_frame_4	32	K	KKKKKKKKKKKTTYEAEGLPA	1	TRUE	83	-12.4436	259.629
ca5b1540-b80b-41a0-b6e3-ada3569d59c4_frame_4	48	K	EGLPAPVPLYKMNKNDSFGFL	0.457143	FALSE	83	-43.8908	107.925
ca5b1540-b80b-41a0-b6e3-ada3569d59c4_frame_4	51	K	PAPVPLYKMNKNDSFGFLILR	0.485714	FALSE	83	-28.617	158.518
ca5b1540-b80b-41a0-b6e3-ada3569d59c4_frame_4	64	K	SFGFLILRILKDTICLV***Y	0.192857	FALSE	83	-42.5637	256.58
ca5b1540-b80b-41a0-b6e3-ada3569d59c4_frame_5	1	K	KKKKKKKKKKK	1	TRUE	83	-28.7784	143.511
ca5b1540-b80b-41a0-b6e3-ada3569d59c4_frame_5	2	K	KKKKKKKKKKKK	1	TRUE	83	-30.336	254.208
ca5b1540-b80b-41a0-b6e3-ada3569d59c4_frame_5	3	K	KKKKKKKKKKKKK	1	TRUE	83	-29.0703	146.07
ca5b1540-b80b-41a0-b6e3-ada3569d59c4_frame_5	4	K	KKKKKKKKKKKKKK	1	TRUE	83	-15.1341	192.813
ca5b1540-b80b-41a0-b6e3-ada3569d59c4_frame_5	5	K	KKKKKKKKKKKKKKK	1	TRUE	83	-15.6889	171.981
ca5b1540-b80b-41a0-b6e3-ada3569d59c4_frame_5	6	K	KKKKKKKKKKKKKKKK	1	TRUE	83	-26.2922	293.178
ca5b1540-b80b-41a0-b6e3-ada3569d59c4_frame_5	7	K	KKKKKKKKKKKKKKKKK	1	TRUE	83	-37.966	123.153
ca5b1540-b80b-41a0-b6e3-ada3569d59c4_frame_5	8	K	KKKKKKKKKKKKKKKKKK	1	TRUE	83	-14.8694	126.859
ca5b1540-b80b-41a0-b6e3-ada3569d59c4_frame_5	9	K	KKKKKKKKKKKKKKKKKKK	1	TRUE	83	-44.5443	212.159
ca5b1540-b80b-41a0-b6e3-ada3569d59c4_frame_5	10	K	KKKKKKKKKKKKKKKKKKKK	1	TRUE	83	-46.9206	247.855
ca5b1540-b80b-41a0-b6e3-ada3569d59c4_frame_5	11	K	KKKKKKKKKKKKKKKKKKKKK	1	TRUE	83	-43.6504	224.299
ca5b1540-b80b-41a0-b6e3-ada3569d59c4_frame_5	12	K	KKKKKKKKKKKKKKKKKKKKK	1	TRUE	83	-45.2959	236.991
ca5b1540-b80b-41a0-b6e3-ada3569d59c4_frame_5	13	K	KKKKKKKKKKKKKKKKKKKKK	1	TRUE	83	-33.2008	111.875
ca5b1540-b80b-41a0-b6e3-ada3569d59c4_frame_5	14	K	KKKKKKKKKKKKKKKKKKKKK	1	TRUE	83	-16.2109	266.175
ca5b1540-b80b-41a0-b6e3-ada3569d59c4_frame_5	15	K	KKKKKKKKKKKKKKKKKKKKK	1	TRUE	83	-28.133	181.393
ca5b1540-b80b-41a0-b6e3-ada3569d59c4_frame_5	16	K	KKKKKKKKKKKKKKKKKKKKK	1	TRUE	83	-26.1744	204.559
ca5b1540-b80b-41a0-b6e3-ada3569d59c4_frame_5	17	K	KKKKKKKKKKKKKKKKKKKKK	1	TRUE	83	-33.0468	105.871
ca5b1540-b80b-41a0-b6e3-ada3569d59c4_frame_5	18	K	KKKKKKKKKKKKKKKKKKKKK	1	TRUE	83	-46.2386	166.028
ca5b1540-b80b-41a0-b6e3-ada3569d59c4_frame_5	19	K	KKKKKKKKKKKKKKKKKKKKK	1	TRUE	83	-21.4662	261.148
ca5b1540-b80b-41a0-b6e3-ada3569d59c4_frame_5	20	K	KKKKKKKKKKKKKKKKKKKKK	1	TRUE	83	-20.2531	261.646
ca5b1540-b80b-41a0-b6e3-ada3569d59c4_frame_5	21	K	KKKKKKKKKKKKKKKKKKKKK	1	TRUE	83	-25.3636	209.203
ca5b1540-b80b-41a0-b6e3-ada3569d59c4_frame_5	22	K	KKKKKKKKKKKKKKKKKKKKK	1	TRUE	83	-27.6014	127.724
ca5b1540-b80b-41a0-b6e3-ada3569d59c4_frame_5	23	K	KKKKKKKKKKKKKKKKKKKKL	1	TRUE	83	-24.2956	206.264
ca5b1540-b80b-41a0-b6e3-ada3569d59c4_frame_5	24	K	KKKKKKKKKKKKKKKKKKKLL	1	TRUE	83	-36.6442	257.893
ca5b1540-b80b-41a0-b6e3-ada3569d59c4_frame_5	25	K	KKKKKKKKKKKKKKKKKKLLT	1	TRUE	83	-20.5167	294.654
ca5b1540-b80b-41a0-b6e3-ada3569d59c4_frame_5	26	K	KKKKKKKKKKKKKKKKKLLTK	1	TRUE	83	-12.3051	233.986
ca5b1540-b80b-41a0-b6e3-ada3569d59c4_frame_5	27	K	KKKKKKKKKKKKKKKKLLTKL	1	TRUE	83	-38.4889	280.771
ca5b1540-b80b-41a0-b6e3-ada3569d59c4_frame_5	28	K	KKKKKKKKKKKKKKKLLTKLR	1	TRUE	83	-35.5594	190.607
ca5b1540-b80b-41a0-b6e3-ada3569d59c4_frame_5	29	K	KKKKKKKKKKKKKKLLTKLRD	1	TRUE	83	-38.6502	219.614
ca5b1540-b80b-41a0-b6e3-ada3569d59c4_frame_5	30	K	KKKKKKKKKKKKKLLTKLRDC	1	TRUE	83	-40.1508	118.954
ca5b1540-b80b-41a0-b6e3-ada3569d59c4_frame_5	31	K	KKKKKKKKKKKKLLTKLRDCQ	1	TRUE	83	-25.187	260.5
ca5b1540-b80b-41a0-b6e3-ada3569d59c4_frame_5	32	K	KKKKKKKKKKKLLTKLRDCQH	1	TRUE	83	-34.3784	297.857
ca5b1540-b80b-41a0-b6e3-ada3569d59c4_frame_5	36	K	KKKKKKKLLTKLRDCQHLYRC	0.538095	TRUE	83	-19.0672	163.191
ca5b1540-b80b-41a0-b6e3-ada3569d59c4_frame_5	48	K	RDCQHLYRCTK*TKMTVLAF*	0.152381	FALSE	83	-45.9452	206.11
ca5b1540-b80b-41a0-b6e3-ada3569d59c4_frame_5	51	K	QHLYRCTK*TKMTVLAF*YCE	0.133333	FALSE	83	-23.7843	268.895
ca5b1540-b80b-41a0-b6e3-ada3569d59c4_frame_5	64	K	VLAF*YCEY*KILFV*YNDNI	0.164286	FALSE	83	-39.6972	131.793
ca5b1540-b80b-41a0-b6e3-ada3569d59c4_frame_6	1	K	KKKKKKKKKKK	1	TRUE	82	-22.8745	155.46
ca5b1540-b80b-41a0-b6e3-ada3569d59c4_frame_6	2	K	KKKKKKKKKKKK	1	TRUE	82	-35.5839	124.915
ca5b1540-b80b-41a0-b6e3-ada3569d59c4_frame_6	3	K	KKKKKKKKKKKKK	1	TRUE	82	-31.0801	270.29
ca5b1540-b80b-41a0-b6e3-ada3569d59c4_frame_6	4	K	KKKKKKKKKKKKKK	1	TRUE	82	-14.3692	264.438
ca5b1540-b80b-41a0-b6e3-ada3569d59c4_frame_6	5	K	KKKKKKKKKKKKKKK	1	TRUE	82	-12.2881	286.309
ca5b1540-b80b-41a0-b6e3-ada3569d59c4_frame_6	6	K	KKKKKKKKKKKKKKKK	1	TRUE	82	-47.6035	124.464
ca5b1540-b80b-41a0-b6e3-ada3569d59c4_frame_6	7	K	KKKKKKKKKKKKKKKKK	1	TRUE	82	-19.5519	128.076
ca5b1540-b80b-41a0-b6e3-ada3569d59c4_frame_6	8	K	KKKKKKKKKKKKKKKKKK	1	TRUE	82	-48.471	233.985
ca5b1540-b80b-41a0-b6e3-ada3569d59c4_frame_6	9	K	KKKKKKKKKKKKKKKKKKK	1	TRUE	82	-44.5987	212.977
ca5b1540-b80b-41a0-b6e3-ada3569d59c4_frame_6	10	K	KKKKKKKKKKKKKKKKKKKK	1	TRUE	82	-18.8108	179.139
ca5b1540-b80b-41a0-b6e3-ada3569d59c4_frame_6	11	K	KKKKKKKKKKKKKKKKKKKKK	1	TRUE	82	-27.3192	131.143
ca5b1540-b80b-41a0-b6e3-ada3569d59c4_frame_6	12	K	KKKKKKKKKKKKKKKKKKKKK	1	TRUE	82	-47.4972	111.776
ca5b1540-b80b-41a0-b6e3-ada3569d59c4_frame_6	13	K	KKKKKKKKKKKKKKKKKKKKK	1	TRUE	82	-47.1679	110.376
ca5b1540-b80b-41a0-b6e3-ada3569d59c4_frame_6	14	K	KKKKKKKKKKKKKKKKKKKKK	1	TRUE	82	-33.3491	286.787
ca5b1540-b80b-41a0-b6e3-ada3569d59c4_frame_6	15	K	KKKKKKKKKKKKKKKKKKKKK	1	TRUE	82	-46.5543	262.424
ca5b1540-b80b-41a0-b6e3-ada3569d59c4_frame_6	16	K	KKKKKKKKKKKKKKKKKKKKK	1	TRUE	82	-35.6035	153.574
ca5b1540-b80b-41a0-b6e3-ada3569d59c4_frame_6	17	K	KKKKKKKKKKKKKKKKKKKKK	1	TRUE	82	-18.4184	200.126
ca5b1540-b80b-41a0-b6e3-ada3569d59c4_frame_6	18	K	KKKKKKKKKKKKKKKKKKKKK	1	TRUE	82	-40.401	128.316
ca5b1540-b80b-41a0-b6e3-ada3569d59c4_frame_6	19	K	KKKKKKKKKKKKKKKKKKKKK	1	TRUE	82	-12.0531	205.648
ca5b1540-b80b-41a0-b6e3-ada3569d59c4_frame_6	20	K	KKKKKKKKKKKKKKKKKKKKK	1	TRUE	82	-17.9887	290.982
ca5b1540-b80b-41a0-b6e3-ada3569d59c4_frame_6	21	K	KKKKKKKKKKKKKKKKKKKKK	1	TRUE	82	-17.285	191.478
ca5b1540-b80b-41a0-b6e3-ada3569d59c4_frame_6	22	K	KKKKKKKKKKKKKKKKKKKKN	1	TRUE	82	-30.0345	139.479
ca5b1540-b80b-41a0-b6e3-ada3569d59c4_frame_6	23	K	KKKKKKKKKKKKKKKKKKKNY	1	TRUE	82	-36.6117	260.302
ca5b1540-b80b-41a0-b6e3-ada3569d59c4_frame_6	24	K	KKKKKKKKKKKKKKKKKKNYL	1	TRUE	82	-48.0125	103.503
ca5b1540-b80b-41a0-b6e3-ada3569d59c4_frame_6	25	K	KKKKKKKKKKKKKKKKKNYLR	1	TRUE	82	-17.6284	255.344
ca5b1540-b80b-41a0-b6e3-ada3569d59c4_frame_6	26	K	KKKKKKKKKKKKKKKKNYLRS	1	TRUE	82	-21.0422	261.901
ca5b1540-b80b-41a0-b6e3-ada3569d59c4_frame_6	27	K	KKKKKKKKKKKKKKKNYLRS*	1	TRUE	82	-29.6489	252.814
ca5b1540-b80b-41a0-b6e3-ada3569d59c4_frame_6	28	K	KKKKKKKKKKKKKKNYLRS*G	1	TRUE	82	-26.8092	106.832
ca5b1540-b80b-41a0-b6e3-ada3569d59c4_frame_6	29	K	KKKKKKKKKKKKKNYLRS*GT	1	TRUE	82	-20.3017	183.325
ca5b1540-b80b-41a0-b6e3-ada3569d59c4_frame_6	30	K	KKKKKKKKKKKKNYLRS*GTA	1	TRUE	82	-13.1378	172.607
ca5b1540-b80b-41a0-b6e3-ada3569d59c4_frame_6	31	K	KKKKKKKKKKKNYLRS*GTAS	1	TRUE	82	-16.0266	263.932
ca5b1540-b80b-41a0-b6e3-ada3569d59c4_frame_6	51	K	STCTVVQNEQK*QFWLFNIAN	0.138095	FALSE	82	-30.8399	181.257
ca5b1540-b80b-41a0-b6e3-ada3569d59c4_frame_6	63	K	QFWLFNIANIKRYYLFSIMII	0.530952	TRUE	82	-14.5017	287.336
ca5b1540-b80b-41a0-b6e3-ada3569d59c4_frame_6	76	K	YLFSIMIIFLKKCLYSL	0.526471	TRUE	82	-48.4781	110.512
ca5b1540-b80b-41a0-b6e3-ada3569d59c4_frame_6	77	K	LFSIMIIFLKKCLYSL	0.5375	TRUE	82	-48.833	116.696
eb4168f7-6543-414a-b4cc-5011e7796f2d_frame_1	13	K	TFFLN*NCGSKIIDF*NIFL	0.135	FALSE	22	-25.522	201.662
eb4168f7-6543-414a-b4cc-5011e7796f2d_frame_2	8	K	IPHFF*TKIVAVK**IFK	0.483333	FALSE	22	-39.5676	234.359
eb4168f7-6543-414a-b4cc-5011e7796f2d_frame_2	13	K	HFF*TKIVAVK**IFKIFF*	0.475	FALSE	22	-32.0043	185.556
eb4168f7-6543-414a-b4cc-5011e7796f2d_frame_2	18	K	KIVAVK**IFKIFF*	0.25	FALSE	22	-44.7524	163.893
eb4168f7-6543-414a-b4cc-5011e7796f2d_frame_3	6	K	FHIFFKLKLWQ*NNRF	0.29375	FALSE	21	-29.5728	104.282
eb4168f7-6543-414a-b4cc-5011e7796f2d_frame_3	8	K	FHIFFKLKLWQ*NNRFLK	0.205556	FALSE	21	-32.3778	103.8
eb4168f7-6543-414a-b4cc-5011e7796f2d_frame_3	18	K	KLWQ*NNRFLKYFF	0.242857	FALSE	21	-32.0376	297.697
eb4168f7-6543-414a-b4cc-5011e7796f2d_frame_4	2	K	SKKYFKNLLFYC	0.583333	TRUE	22	-30.5261	233.003
eb4168f7-6543-414a-b4cc-5011e7796f2d_frame_4	3	K	SKKYFKNLLFYCH	0.569231	TRUE	22	-29.9331	298.735
eb4168f7-6543-414a-b4cc-5011e7796f2d_frame_4	6	K	SKKYFKNLLFYCHNFS	0.5625	TRUE	22	-49.4262	277.616
eb4168f7-6543-414a-b4cc-5011e7796f2d_frame_4	18	K	LLFYCHNFSLKKMWN	0.516667	TRUE	22	-41.7018	231.948
eb4168f7-6543-414a-b4cc-5011e7796f2d_frame_4	19	K	LFYCHNFSLKKMWN	0.514286	TRUE	22	-34.848	134.492
eb4168f7-6543-414a-b4cc-5011e7796f2d_frame_5	2	K	QKNILKIYYFTA	0.575	TRUE	22	-18.7132	276.138
eb4168f7-6543-414a-b4cc-5011e7796f2d_frame_5	6	K	QKNILKIYYFTATILV	0.575	TRUE	22	-13.5043	240.621
eb4168f7-6543-414a-b4cc-5011e7796f2d_frame_5	18	K	YYFTATILV*KKCGM	0.196667	FALSE	22	-15.5399	185.966
eb4168f7-6543-414a-b4cc-5011e7796f2d_frame_5	19	K	YFTATILV*KKCGM	0.207143	FALSE	22	-47.2297	279.286
eb4168f7-6543-414a-b4cc-5011e7796f2d_frame_6	1	K	KKIF*KSIILL	0.327273	FALSE	21	-27.4526	100.058
eb4168f7-6543-414a-b4cc-5011e7796f2d_frame_6	2	K	KKIF*KSIILLP	0.325	FALSE	21	-18.2513	150.31
eb4168f7-6543-414a-b4cc-5011e7796f2d_frame_6	6	K	KKIF*KSIILLPQF*F	0.3	FALSE	21	-21.3863	189.228
eb4168f7-6543-414a-b4cc-5011e7796f2d_frame_6	17	K	SIILLPQF*FKKNVE	0.23	FALSE	21	-39.306	294.793
eb4168f7-6543-414a-b4cc-5011e7796f2d_frame_6	18	K	IILLPQF*FKKNVE	0.235714	FALSE	21	-43.3193	152.397
f9b4c11e-5018-40d3-8200-1332de4c1cb5_frame_2	13	K	CHLSWFSYIAKVSCLEAGTAS	0.128571	FALSE	23	-13.1699	162.124
f9b4c11e-5018-40d3-8200-1332de4c1cb5_frame_3	18	K	SVTLLRLAA*KLGLPA	0.2375	FALSE	23	-30.5596	102.425
f9b4c11e-5018-40d3-8200-1332de4c1cb5_frame_4	8	K	VLAVPASKQLTLAM*LNQ	0.272222	FALSE	24	-14.7247	184.408
f9b4c11e-5018-40d3-8200-1332de4c1cb5_frame_4	23	K	AM*LNQER*HKH	0.183333	FALSE	24	-43.7159	286.991
f9b4c11e-5018-40d3-8200-1332de4c1cb5_frame_5	18	K	SS*P*QCN*TKKDDIN	0.1625	FALSE	23	-18.7455	144.933
f9b4c11e-5018-40d3-8200-1332de4c1cb5_frame_5	19	K	S*P*QCN*TKKDDIN	0.163333	FALSE	23	-23.7719	193.3
f9b4c11e-5018-40d3-8200-1332de4c1cb5_frame_6	19	K	ANLSNVTEPRKMT*T	0.21	FALSE	23	-24.3485	191.088
a44ac141-23da-4f16-a88c-fed2d29f54fa_frame_2	1	K	KYFN*IIYFKI	0.272727	FALSE	19	-18.027	223.402
a44ac141-23da-4f16-a88c-fed2d29f54fa_frame_2	10	K	KYFN*IIYFKIYFSIQCKI	0.163158	FALSE	19	-25.3819	114.072
a44ac141-23da-4f16-a88c-fed2d29f54fa_frame_2	18	K	YFKIYFSIQCKI	0.216667	FALSE	19	-39.2813	289.516
a44ac141-23da-4f16-a88c-fed2d29f54fa_frame_3	10	K	NILIRSYILKFIFLYNVKS	0.189474	FALSE	19	-36.0534	107.226
a44ac141-23da-4f16-a88c-fed2d29f54fa_frame_3	18	K	ILKFIFLYNVKS	0.25	FALSE	19	-41.7099	279.214
a44ac141-23da-4f16-a88c-fed2d29f54fa_frame_4	8	K	SILHCIEK*ILKYMI*LK	0.161111	FALSE	20	-31.283	245.231
a44ac141-23da-4f16-a88c-fed2d29f54fa_frame_4	12	K	ILHCIEK*ILKYMI*LKYL	0.157895	FALSE	20	-29.4177	237.52
a44ac141-23da-4f16-a88c-fed2d29f54fa_frame_4	18	K	K*ILKYMI*LKYL	0.234615	FALSE	20	-23.0653	191.552
a44ac141-23da-4f16-a88c-fed2d29f54fa_frame_5	7	K	RFYIV*KNKF*NI*SN*	0.152941	FALSE	19	-21.5589	210.968
a44ac141-23da-4f16-a88c-fed2d29f54fa_frame_5	9	K	RFYIV*KNKF*NI*SN*NI	0.152632	FALSE	19	-13.7403	184.618
a44ac141-23da-4f16-a88c-fed2d29f54fa_frame_6	7	K	DFTLYRKINFKIYDLIK	0.488235	FALSE	19	-13.7412	126.843
a44ac141-23da-4f16-a88c-fed2d29f54fa_frame_6	11	K	DFTLYRKINFKIYDLIKIF	0.489474	FALSE	19	-17.3733	209.095
a44ac141-23da-4f16-a88c-fed2d29f54fa_frame_6	17	K	KINFKIYDLIKIF	0.257692	FALSE	19	-29.7027	278.758
4d74a243-09fd-42ee-8df2-49266e83006f_frame_1	5	K	HLIIKFLRLFNDINI	0.286667	FALSE	142	-12.0274	230.536
4d74a243-09fd-42ee-8df2-49266e83006f_frame_1	16	K	FLRLFNDINIKYFKNIICLKL	0.595238	TRUE	142	-40.473	207.247
4d74a243-09fd-42ee-8df2-49266e83006f_frame_1	19	K	LFNDINIKYFKNIICLKL*YL	0.566667	TRUE	142	-39.8659	213.773
4d74a243-09fd-42ee-8df2-49266e83006f_frame_1	25	K	IKYFKNIICLKL*YLNERNVS	0.271429	FALSE	142	-22.3321	178.174
4d74a243-09fd-42ee-8df2-49266e83006f_frame_1	42	K	RNVSDF*LI*K*I*LRLTTYE	0.242857	FALSE	142	-18.1095	270.292
4d74a243-09fd-42ee-8df2-49266e83006f_frame_1	66	K	LPAP*YLFLIKIFII*SFFTV	0.171429	FALSE	142	-16.1764	217.26
4d74a243-09fd-42ee-8df2-49266e83006f_frame_1	88	K	*ITTILS*IYKYLFF*KRIYI	0.157143	FALSE	142	-49.7918	214.088
4d74a243-09fd-42ee-8df2-49266e83006f_frame_1	94	K	S*IYKYLFF*KRIYILLILYE	0.157143	FALSE	142	-33.8222	131.302
4d74a243-09fd-42ee-8df2-49266e83006f_frame_1	113	K	YEIFSFIFISKHIFYII*SLH	0.188095	FALSE	142	-29.0089	196.093
4d74a243-09fd-42ee-8df2-49266e83006f_frame_1	135	K	LLIIIF*CLIKIESVI*H	0.2	FALSE	142	-42.5475	171.549
4d74a243-09fd-42ee-8df2-49266e83006f_frame_2	19	K	CLTILISNILKI*YV*NYDI*	0.22381	FALSE	142	-17.6608	272.029
4d74a243-09fd-42ee-8df2-49266e83006f_frame_2	43	K	MFLIFN*YRNKYS*G*LLTKL	0.252381	FALSE	142	-33.0356	220.287
4d74a243-09fd-42ee-8df2-49266e83006f_frame_2	52	K	NKYS*G*LLTKLRDCQHLNIF	0.138095	FALSE	142	-28.5102	109.979
4d74a243-09fd-42ee-8df2-49266e83006f_frame_2	66	K	CQHLNIFF**KFL*SNPSLRY	0.138095	FALSE	142	-22.1642	242.342
4d74a243-09fd-42ee-8df2-49266e83006f_frame_2	78	K	L*SNPSLRYYKSQQYYLKFIN	0.147619	FALSE	142	-21.1972	260.399
4d74a243-09fd-42ee-8df2-49266e83006f_frame_2	85	K	RYYKSQQYYLKFINICFFENA	0.147619	FALSE	142	-20.3758	295.429
4d74a243-09fd-42ee-8df2-49266e83006f_frame_2	104	K	NASIFYLYYTKYFRLYLFQNI	0.197619	FALSE	142	-28.5364	250.504
4d74a243-09fd-42ee-8df2-49266e83006f_frame_2	135	K	Y*L*YSNV*LK*NQLYNI	0.155556	FALSE	142	-21.6275	260.093
4d74a243-09fd-42ee-8df2-49266e83006f_frame_3	4	K	SYNKISKIV*RY*Y	0.55	TRUE	142	-26.0324	228.692
4d74a243-09fd-42ee-8df2-49266e83006f_frame_3	7	K	SYNKISKIV*RY*YQIF	0.552941	TRUE	142	-28.2106	113.034
4d74a243-09fd-42ee-8df2-49266e83006f_frame_3	19	K	V*RY*YQIF*KYNMFEIMIFE	0.233333	FALSE	142	-24.875	171.774
4d74a243-09fd-42ee-8df2-49266e83006f_frame_3	32	K	MFEIMIFE*EKCF*FLTNIEI	0.233333	FALSE	142	-41.8056	108.36
4d74a243-09fd-42ee-8df2-49266e83006f_frame_3	46	K	FLTNIEINIAKVNYLRS*GTA	0.152381	FALSE	142	-16.4851	137.881
4d74a243-09fd-42ee-8df2-49266e83006f_frame_3	65	K	TASTLISFSNKNFYNLILLYG	0.142857	FALSE	142	-36.6359	124.434
4d74a243-09fd-42ee-8df2-49266e83006f_frame_3	93	K	ILNL*IFVFLKTHLYFTYTIR	0.161905	FALSE	142	-41.1153	165.079
4d74a243-09fd-42ee-8df2-49266e83006f_frame_3	112	K	IRNIFVYIYFKTYFLYNIVTA	0.211905	FALSE	142	-13.2291	244.443
4d74a243-09fd-42ee-8df2-49266e83006f_frame_4	1	K	KCYITDSILIR	0.263636	FALSE	142	-40.9528	209.405
4d74a243-09fd-42ee-8df2-49266e83006f_frame_4	19	K	LIRH*NIIINKKCSDYII*KI	0.566667	TRUE	142	-48.3045	178.35
4d74a243-09fd-42ee-8df2-49266e83006f_frame_4	20	K	IRH*NIIINKKCSDYII*KIC	0.557143	TRUE	142	-20.0962	197.497
4d74a243-09fd-42ee-8df2-49266e83006f_frame_4	28	K	NKKCSDYII*KICFEININEN	0.238095	FALSE	142	-30.7753	131.187
4d74a243-09fd-42ee-8df2-49266e83006f_frame_4	45	K	INENISYSISKI*MRFQKNKY	0.166667	FALSE	142	-47.2619	254.317
4d74a243-09fd-42ee-8df2-49266e83006f_frame_4	52	K	SISKI*MRFQKNKYL*I*DNI	0.166667	FALSE	142	-32.0525	139.431
4d74a243-09fd-42ee-8df2-49266e83006f_frame_4	54	K	SKI*MRFQKNKYL*I*DNIVV	0.171429	FALSE	142	-13.1002	210.604
4d74a243-09fd-42ee-8df2-49266e83006f_frame_4	70	K	DNIVVIYNTVKKD*IIKIFIR	0.485714	FALSE	142	-31.0454	186.811
4d74a243-09fd-42ee-8df2-49266e83006f_frame_4	71	K	NIVVIYNTVKKD*IIKIFIRK	0.504762	TRUE	142	-26.6737	206.817
4d74a243-09fd-42ee-8df2-49266e83006f_frame_4	76	K	YNTVKKD*IIKIFIRKRY*GA	0.490476	FALSE	142	-16.9809	200.396
4d74a243-09fd-42ee-8df2-49266e83006f_frame_4	81	K	KD*IIKIFIRKRY*GAGSPSA	1	TRUE	142	-33.854	251.389
4d74a243-09fd-42ee-8df2-49266e83006f_frame_4	107	K	LSYIYFYIS*KSETFLSFKYH	0.178571	FALSE	142	-20.4533	222.953
4d74a243-09fd-42ee-8df2-49266e83006f_frame_4	115	K	S*KSETFLSFKYHNFKHIIFL	0.507143	TRUE	142	-29.7961	186.595
4d74a243-09fd-42ee-8df2-49266e83006f_frame_4	120	K	TFLSFKYHNFKHIIFLKYLIL	0.52619	TRUE	142	-30.4333	281.876
4d74a243-09fd-42ee-8df2-49266e83006f_frame_4	126	K	YHNFKHIIFLKYLILISLNNL	0.211905	FALSE	142	-12.864	282.397
4d74a243-09fd-42ee-8df2-49266e83006f_frame_5	19	K	*LDIRIL*LIKNAVTILYKKY	0.280952	FALSE	142	-27.0714	278.989
4d74a243-09fd-42ee-8df2-49266e83006f_frame_5	27	K	LIKNAVTILYKKYVLK*I*TK	0.895238	TRUE	142	-28.1814	190.001
4d74a243-09fd-42ee-8df2-49266e83006f_frame_5	28	K	IKNAVTILYKKYVLK*I*TKI	0.895238	TRUE	142	-33.9543	130.614
4d74a243-09fd-42ee-8df2-49266e83006f_frame_5	32	K	VTILYKKYVLK*I*TKIFRIV	0.6	TRUE	142	-17.0707	130.851
4d74a243-09fd-42ee-8df2-49266e83006f_frame_5	37	K	KKYVLK*I*TKIFRIV*VKYR	0.314286	FALSE	142	-31.3918	164.097
4d74a243-09fd-42ee-8df2-49266e83006f_frame_5	45	K	*TKIFRIV*VKYRCVFKKTNI	0.204762	FALSE	142	-43.7322	212.789
4d74a243-09fd-42ee-8df2-49266e83006f_frame_5	51	K	IV*VKYRCVFKKTNIYKFKII	0.509524	TRUE	142	-40.8006	101.715
4d74a243-09fd-42ee-8df2-49266e83006f_frame_5	52	K	V*VKYRCVFKKTNIYKFKIIL	0.809524	TRUE	142	-28.204	279.397
4d74a243-09fd-42ee-8df2-49266e83006f_frame_5	57	K	RCVFKKTNIYKFKIILL*FII	0.509524	TRUE	142	-43.5904	296.133
4d74a243-09fd-42ee-8df2-49266e83006f_frame_5	59	K	VFKKTNIYKFKIILL*FIIP*	0.2	FALSE	142	-16.3893	193.148
4d74a243-09fd-42ee-8df2-49266e83006f_frame_5	76	K	IIP*RRIRL*KFLLEKDIKVL	0.519048	TRUE	142	-47.9201	240.414
4d74a243-09fd-42ee-8df2-49266e83006f_frame_5	81	K	RIRL*KFLLEKDIKVLAVPQL	0.514286	TRUE	142	-18.4032	161.599
4d74a243-09fd-42ee-8df2-49266e83006f_frame_5	84	K	L*KFLLEKDIKVLAVPQLRK*	0.504762	TRUE	142	-49.2721	287.263
4d74a243-09fd-42ee-8df2-49266e83006f_frame_5	93	K	IKVLAVPQLRK*LTLAIFISI	0.204762	FALSE	142	-14.4416	162.859
4d74a243-09fd-42ee-8df2-49266e83006f_frame_5	106	K	TLAIFISILVKNQKHFSHSNI	0.516667	TRUE	142	-41.5646	209.078
4d74a243-09fd-42ee-8df2-49266e83006f_frame_5	109	K	IFISILVKNQKHFSHSNIIIS	0.516667	TRUE	142	-44.54	163.555
4d74a243-09fd-42ee-8df2-49266e83006f_frame_6	19	K	N*TLEYYN**KMQ*LYYIKNM	0.209524	FALSE	142	-27.1874	129.224
4d74a243-09fd-42ee-8df2-49266e83006f_frame_6	27	K	**KMQ*LYYIKNMF*NKYKRK	0.27619	FALSE	142	-20.669	195.161
4d74a243-09fd-42ee-8df2-49266e83006f_frame_6	33	K	LYYIKNMF*NKYKRKYFV*YK	1	TRUE	142	-23.7792	167.339
4d74a243-09fd-42ee-8df2-49266e83006f_frame_6	35	K	YIKNMF*NKYKRKYFV*YK*N	1	TRUE	142	-40.9352	117.954
4d74a243-09fd-42ee-8df2-49266e83006f_frame_6	37	K	KNMF*NKYKRKYFV*YK*NID	1	TRUE	142	-36.5386	128.825
4d74a243-09fd-42ee-8df2-49266e83006f_frame_6	43	K	KYKRKYFV*YK*NIDAFSKKQ	0.295238	FALSE	142	-45.9922	108.658
4d74a243-09fd-42ee-8df2-49266e83006f_frame_6	51	K	*YK*NIDAFSKKQIFINLR*Y	0.461905	FALSE	142	-46.3951	112.931
4d74a243-09fd-42ee-8df2-49266e83006f_frame_6	52	K	YK*NIDAFSKKQIFINLR*YC	0.461905	FALSE	142	-44.4931	287.421
4d74a243-09fd-42ee-8df2-49266e83006f_frame_6	69	K	R*YCCDL*YRKEGLDYKNFY*	0.109524	FALSE	142	-23.0778	160.617
4d74a243-09fd-42ee-8df2-49266e83006f_frame_6	75	K	L*YRKEGLDYKNFY*KKILRC	0.166667	FALSE	142	-38.4742	299.333
4d74a243-09fd-42ee-8df2-49266e83006f_frame_6	80	K	EGLDYKNFY*KKILRCWQSLS	0.152381	FALSE	142	-28.4955	119.336
4d74a243-09fd-42ee-8df2-49266e83006f_frame_6	81	K	GLDYKNFY*KKILRCWQSLSF	0.161905	FALSE	142	-21.2389	254.032
4d74a243-09fd-42ee-8df2-49266e83006f_frame_6	106	K	P*LYLFLY*LKIRNISLIQIS	0.211905	FALSE	142	-18.1084	137.98
4d74a243-09fd-42ee-8df2-49266e83006f_frame_6	125	K	IS*FQTYYIFKIFDINIVKQS	0.202381	FALSE	142	-21.2332	277.196
4d74a243-09fd-42ee-8df2-49266e83006f_frame_6	133	K	IFKIFDINIVKQS*KFYYKM	0.235	FALSE	142	-13.0413	160.255
4d74a243-09fd-42ee-8df2-49266e83006f_frame_6	137	K	FDINIVKQS*KFYYKM	0.51875	TRUE	142	-17.7366	268.311
4d74a243-09fd-42ee-8df2-49266e83006f_frame_6	141	K	IVKQS*KFYYKM	0.533333	TRUE	142	-47.8627	207.583
8442c32f-697d-49e1-a0ac-894cfdfa31f7_frame_1	13	K	IY*SAVFLMWKSISYTKFHLI	0.161905	FALSE	33	-39.9306	122.876
8442c32f-697d-49e1-a0ac-894cfdfa31f7_frame_1	19	K	FLMWKSISYTKFHLIYINWTN	0.161905	FALSE	33	-34.7455	199.687
8442c32f-697d-49e1-a0ac-894cfdfa31f7_frame_2	2	K	GKYTKVQCFSCG	0.525	TRUE	33	-12.268	247.781
8442c32f-697d-49e1-a0ac-894cfdfa31f7_frame_2	5	K	GKYTKVQCFSCGSQF	0.526667	TRUE	33	-30.3033	260.485
8442c32f-697d-49e1-a0ac-894cfdfa31f7_frame_2	32	K	*FI*TGRI*SKS	0.191667	FALSE	33	-49.5316	173.333
8442c32f-697d-49e1-a0ac-894cfdfa31f7_frame_3	5	K	GNILKCSVSHVEVNF	0.233333	FALSE	33	-34.8749	204.515
8442c32f-697d-49e1-a0ac-894cfdfa31f7_frame_3	18	K	VSHVEVNFVHKISSDLYKLDE	0.133333	FALSE	33	-38.2588	100.429
8442c32f-697d-49e1-a0ac-894cfdfa31f7_frame_3	25	K	FVHKISSDLYKLDEFNLNQ	0.192105	FALSE	33	-23.4235	298.259
8442c32f-697d-49e1-a0ac-894cfdfa31f7_frame_4	5	K	LI*IKFVQFI*IR*N	0.273333	FALSE	33	-44.7462	117.719
8442c32f-697d-49e1-a0ac-894cfdfa31f7_frame_5	11	K	*FRLNSSSLYKSDEILCTKLT	0.147619	FALSE	33	-19.8972	278.515
8442c32f-697d-49e1-a0ac-894cfdfa31f7_frame_5	19	K	LYKSDEILCTKLTST*ETLHF	0.12381	FALSE	33	-22.8376	297.727
8442c32f-697d-49e1-a0ac-894cfdfa31f7_frame_6	14	K	*IRPVYINQMKFCVRN*LPHE	0.157143	FALSE	33	-37.9207	119.502
8442c32f-697d-49e1-a0ac-894cfdfa31f7_frame_6	25	K	FCVRN*LPHEKHCTLVYFP	0.186842	FALSE	33	-21.1055	298.821
fff6773e-976a-4877-ae33-4bda264267b9_frame_1	1	K	KCGMK*HRKML	0.6	TRUE	23	-37.342	248.908
fff6773e-976a-4877-ae33-4bda264267b9_frame_1	5	K	KCGMK*HRKMLMKYK	0.613333	TRUE	23	-21.4615	146.46
fff6773e-976a-4877-ae33-4bda264267b9_frame_1	9	K	KCGMK*HRKMLMKYKHY*I	0.478947	FALSE	23	-26.7139	199.253
fff6773e-976a-4877-ae33-4bda264267b9_frame_1	13	K	GMK*HRKMLMKYKHY*I*NLH	0.457143	FALSE	23	-39.0909	207.109
fff6773e-976a-4877-ae33-4bda264267b9_frame_1	15	K	K*HRKMLMKYKHY*I*NLH	0.163158	FALSE	23	-16.3582	236.836
fff6773e-976a-4877-ae33-4bda264267b9_frame_2	9	K	NVE*NNIEKC**NINIIRF	0.131579	FALSE	22	-32.336	186.491
fff6773e-976a-4877-ae33-4bda264267b9_frame_2	20	K	C**NINIIRFKIS	0.211538	FALSE	22	-48.6793	195.608
fff6773e-976a-4877-ae33-4bda264267b9_frame_3	8	K	MWNEIT*KNVDEI*TLLD	0.122222	FALSE	22	-48.0073	124.898
fff6773e-976a-4877-ae33-4bda264267b9_frame_3	20	K	VDEI*TLLDLKSP	0.188462	FALSE	22	-29.1204	193.276
fff6773e-976a-4877-ae33-4bda264267b9_frame_6	4	K	GDFKSNNVYISSTF	0.228571	FALSE	22	-45.9973	166.786
79bcc8a2-16e6-42e5-b921-2562bb5daf8d_frame_1	2	K	SKNLFNRFHPD*	0.258333	FALSE	17	-21.5679	255.879
79bcc8a2-16e6-42e5-b921-2562bb5daf8d_frame_2	2	K	QKIFLIGSTQIE	0.25	FALSE	16	-27.0292	225.32
79bcc8a2-16e6-42e5-b921-2562bb5daf8d_frame_3	1	K	KKSF**VPPRL	0.309091	FALSE	16	-31.4091	281.845
79bcc8a2-16e6-42e5-b921-2562bb5daf8d_frame_3	2	K	KKSF**VPPRLR	0.325	FALSE	16	-31.7087	202.57
79bcc8a2-16e6-42e5-b921-2562bb5daf8d_frame_4	13	K	WGFSIWVEPIKKIF*	0.53	TRUE	17	-19.0086	134.201
79bcc8a2-16e6-42e5-b921-2562bb5daf8d_frame_4	14	K	GFSIWVEPIKKIF*	0.528571	TRUE	17	-14.6035	251.912
79bcc8a2-16e6-42e5-b921-2562bb5daf8d_frame_5	13	K	GDSQSGWNLLKRFF	0.507143	TRUE	16	-13.888	203.621
79bcc8a2-16e6-42e5-b921-2562bb5daf8d_frame_6	13	K	GILNLGGTY*KDFL	0.164286	FALSE	16	-21.8346	178.482
11018df7-8204-49dc-a489-b43827146daa_frame_6	7	K	ISMSRQKKQSTF	0.5	FALSE	12	-18.2699	295.484
11018df7-8204-49dc-a489-b43827146daa_frame_6	8	K	ISMSRQKKQSTF	0.5	FALSE	12	-45.1582	234.386
9c11b9b3-25fe-4dbb-9c70-e3c82f15abcf_frame_1	1	K	KSKLKITEEEL	0.581818	TRUE	20	-22.5929	246.879
9c11b9b3-25fe-4dbb-9c70-e3c82f15abcf_frame_1	3	K	KSKLKITEEELMA	0.584615	TRUE	20	-26.6302	212.077
9c11b9b3-25fe-4dbb-9c70-e3c82f15abcf_frame_1	5	K	KSKLKITEEELMAAN	0.58	TRUE	20	-27.7676	211.844
9c11b9b3-25fe-4dbb-9c70-e3c82f15abcf_frame_2	5	K	NLN*KSPKKN*WLQI	0.88	TRUE	20	-47.2184	153.288
9c11b9b3-25fe-4dbb-9c70-e3c82f15abcf_frame_2	8	K	NLN*KSPKKN*WLQILTL	0.777778	TRUE	20	-14.1119	165.484
9c11b9b3-25fe-4dbb-9c70-e3c82f15abcf_frame_2	9	K	NLN*KSPKKN*WLQILTLT	0.773684	TRUE	20	-34.2516	171.198
9c11b9b3-25fe-4dbb-9c70-e3c82f15abcf_frame_3	4	K	I*TKNHRRRIDGCK	0.285714	FALSE	19	-26.438	210.934
9c11b9b3-25fe-4dbb-9c70-e3c82f15abcf_frame_3	14	K	KNHRRRIDGCKF*H*Q	0.1625	FALSE	19	-17.5522	157.214
9c11b9b3-25fe-4dbb-9c70-e3c82f15abcf_frame_5	5	K	PVSVKICSHQFFFGD	0.24	FALSE	20	-23.8146	212.998
9c11b9b3-25fe-4dbb-9c70-e3c82f15abcf_frame_6	5	K	LSVLKFAAINSSSVI	0.28	FALSE	19	-33.6665	133.403
08cef06e-45e5-4a72-bf37-732f5d7f9e69_frame_1	6	K	R*QSQKYLLKI*RV*L	0.58125	TRUE	21	-12.4834	254.209
08cef06e-45e5-4a72-bf37-732f5d7f9e69_frame_1	10	K	R*QSQKYLLKI*RV*L*YIF	0.465	FALSE	21	-13.3115	120.327
08cef06e-45e5-4a72-bf37-732f5d7f9e69_frame_2	5	K	DNNHKNIY*KYKEYN	0.22	FALSE	20	-22.3471	113.624
08cef06e-45e5-4a72-bf37-732f5d7f9e69_frame_2	10	K	DNNHKNIY*KYKEYNCNISL	0.12	FALSE	20	-30.32	104.39
08cef06e-45e5-4a72-bf37-732f5d7f9e69_frame_2	12	K	NNHKNIY*KYKEYNCNISL	0.126316	FALSE	20	-36.3176	112.104
08cef06e-45e5-4a72-bf37-732f5d7f9e69_frame_3	5	K	ITITKISIKNIKSII	0.606667	TRUE	20	-22.4559	155.669
08cef06e-45e5-4a72-bf37-732f5d7f9e69_frame_3	9	K	ITITKISIKNIKSIIVIYL	0.494737	FALSE	20	-46.1992	178.192
08cef06e-45e5-4a72-bf37-732f5d7f9e69_frame_3	12	K	TITKISIKNIKSIIVIYLY	0.484211	FALSE	20	-47.6644	281.073
08cef06e-45e5-4a72-bf37-732f5d7f9e69_frame_4	2	K	YKDILQLYSLYF	0.233333	FALSE	21	-32.8975	194.338
08cef06e-45e5-4a72-bf37-732f5d7f9e69_frame_5	2	K	IKIYYNYTLYIF	0.233333	FALSE	20	-37.5953	217.185
ab61947f-3909-454f-a969-9f9b1084dcfe_frame_1	3	K	LFKREIYNFSS*S	0.553846	TRUE	76	-19.3848	203.674
ab61947f-3909-454f-a969-9f9b1084dcfe_frame_1	24	K	VCIM*GCHIYKKRINICVGIL	1	TRUE	76	-15.0091	129.323
ab61947f-3909-454f-a969-9f9b1084dcfe_frame_1	25	K	CIM*GCHIYKKRINICVGILN	1	TRUE	76	-44.0454	142.03
ab61947f-3909-454f-a969-9f9b1084dcfe_frame_1	48	K	QFQIYMSPRDKSDRMIIYD*V	0.152381	FALSE	76	-44.861	123.513
ab61947f-3909-454f-a969-9f9b1084dcfe_frame_1	64	K	IYD*VILF**KRCWQSLSS*V	0.183333	FALSE	76	-35.4883	296.485
ab61947f-3909-454f-a969-9f9b1084dcfe_frame_2	3	K	YSKEKYITFRHSQ	0.253846	FALSE	76	-12.5652	113.454
ab61947f-3909-454f-a969-9f9b1084dcfe_frame_2	5	K	YSKEKYITFRHSQYA	0.246667	FALSE	76	-18.9978	231.291
ab61947f-3909-454f-a969-9f9b1084dcfe_frame_2	18	K	TFRHSQYA*CKDAISTKKGLI	0.257143	FALSE	76	-42.2009	156.877
ab61947f-3909-454f-a969-9f9b1084dcfe_frame_2	24	K	YA*CKDAISTKKGLIFVLEF*	0.452381	FALSE	76	-20.8216	156.516
ab61947f-3909-454f-a969-9f9b1084dcfe_frame_2	25	K	A*CKDAISTKKGLIFVLEF*T	0.457143	FALSE	76	-48.5921	268.888
ab61947f-3909-454f-a969-9f9b1084dcfe_frame_2	57	K	TNQIV**YTIKSFFFDKKGAG	0.197619	FALSE	76	-44.7007	224.212
ab61947f-3909-454f-a969-9f9b1084dcfe_frame_2	63	K	*YTIKSFFFDKKGAGSPSARK	0.530952	TRUE	76	-40.2718	246.323
ab61947f-3909-454f-a969-9f9b1084dcfe_frame_2	64	K	YTIKSFFFDKKGAGSPSARK*	0.530952	TRUE	76	-39.6212	107.168
ab61947f-3909-454f-a969-9f9b1084dcfe_frame_2	73	K	KKGAGSPSARK*FF	0.25	FALSE	76	-25.575	113.405
ab61947f-3909-454f-a969-9f9b1084dcfe_frame_3	3	K	IQKRNI*LFVIVS	0.592308	TRUE	75	-35.4408	230.793
ab61947f-3909-454f-a969-9f9b1084dcfe_frame_3	24	K	MHNVRMPYLQKKD*YLCWNFE	0.447619	FALSE	75	-17.9619	149.828
ab61947f-3909-454f-a969-9f9b1084dcfe_frame_3	25	K	HNVRMPYLQKKD*YLCWNFEL	0.447619	FALSE	75	-29.7101	131.208
ab61947f-3909-454f-a969-9f9b1084dcfe_frame_3	63	K	NIRLSHSFLIKKVLAVPQLVS	0.545238	TRUE	75	-16.1551	154.785
ab61947f-3909-454f-a969-9f9b1084dcfe_frame_3	64	K	IRLSHSFLIKKVLAVPQLVSS	0.545238	TRUE	75	-20.1839	142.4
ab61947f-3909-454f-a969-9f9b1084dcfe_frame_4	1	K	KKLLTS*GTAS	0.263636	FALSE	76	-44.0137	247.238
ab61947f-3909-454f-a969-9f9b1084dcfe_frame_4	2	K	KKLLTS*GTAST	0.258333	FALSE	76	-17.2854	192.861
ab61947f-3909-454f-a969-9f9b1084dcfe_frame_4	16	K	S*GTASTFFIKKE*LNRILSY	0.552381	TRUE	76	-26.4359	203.045
ab61947f-3909-454f-a969-9f9b1084dcfe_frame_4	17	K	*GTASTFFIKKE*LNRILSYD	0.547619	TRUE	76	-14.0246	226.561
ab61947f-3909-454f-a969-9f9b1084dcfe_frame_4	44	K	TYISETD*SSKFQHKY*SFFC	0.409524	FALSE	76	-21.4212	283.547
ab61947f-3909-454f-a969-9f9b1084dcfe_frame_4	48	K	ETD*SSKFQHKY*SFFCRYGI	0.419048	FALSE	76	-26.4481	178.164
ab61947f-3909-454f-a969-9f9b1084dcfe_frame_4	68	K	ILTLCILTMTKSYIFLF*I	0.207895	FALSE	76	-12.0734	199.614
ab61947f-3909-454f-a969-9f9b1084dcfe_frame_5	1	K	KNYLRAEGLPA	0.272727	FALSE	76	-38.4898	189.356
ab61947f-3909-454f-a969-9f9b1084dcfe_frame_5	16	K	AEGLPAPFLSKKNDLIVYYHT	0.547619	TRUE	76	-42.4243	118.699
ab61947f-3909-454f-a969-9f9b1084dcfe_frame_5	17	K	EGLPAPFLSKKNDLIVYYHTI	0.547619	TRUE	76	-15.9409	160.745
ab61947f-3909-454f-a969-9f9b1084dcfe_frame_5	38	K	*FVSW*HIYLKLIKVQNSNTN	0.447619	FALSE	76	-44.5173	271.417
ab61947f-3909-454f-a969-9f9b1084dcfe_frame_5	41	K	SW*HIYLKLIKVQNSNTNINP	0.452381	FALSE	76	-12.6911	215.874
ab61947f-3909-454f-a969-9f9b1084dcfe_frame_5	68	K	SLHYAY*L*RKVIYFSFE*	0.176316	FALSE	76	-34.9422	209.826
ab61947f-3909-454f-a969-9f9b1084dcfe_frame_6	1	K	KTTYELRDCQH	0.218182	FALSE	75	-20.2564	233.991
ab61947f-3909-454f-a969-9f9b1084dcfe_frame_6	16	K	LRDCQHLFYQKRMT*SYIIIR	0.561905	TRUE	75	-46.26	207.879
ab61947f-3909-454f-a969-9f9b1084dcfe_frame_6	41	K	RGDIYI*N*LKFKIPTQILIL	0.166667	FALSE	75	-37.9804	289.755
ab61947f-3909-454f-a969-9f9b1084dcfe_frame_6	43	K	DIYI*N*LKFKIPTQILILFL	0.166667	FALSE	75	-29.0261	204.989
ab61947f-3909-454f-a969-9f9b1084dcfe_frame_6	68	K	PYIMHTDYDEKLYISLLN	0.166667	FALSE	75	-24.2065	171.217
58bbebf4-bc5a-4471-b13e-64e387ce6ae4_frame_1	10	K	NFVTIRSPQKSYECTK*LID	0.25	FALSE	39	-36.8135	168.526
58bbebf4-bc5a-4471-b13e-64e387ce6ae4_frame_1	16	K	RSPQKSYECTK*LIDLCLQRC	0.147619	FALSE	39	-14.7984	222.791
58bbebf4-bc5a-4471-b13e-64e387ce6ae4_frame_2	9	K	ILSRFAVHKRVMNAQND**	0.568421	TRUE	38	-13.679	158.22
58bbebf4-bc5a-4471-b13e-64e387ce6ae4_frame_3	9	K	FCHDSQSTKEL*MHKMINR	0.242105	FALSE	38	-32.0965	204.481
58bbebf4-bc5a-4471-b13e-64e387ce6ae4_frame_3	15	K	SQSTKEL*MHKMINRPLLAAM	0.17619	FALSE	38	-37.7071	241.277
58bbebf4-bc5a-4471-b13e-64e387ce6ae4_frame_3	36	K	*EVWEV*SCNKYE	0.142308	FALSE	38	-20.4342	128.161
58bbebf4-bc5a-4471-b13e-64e387ce6ae4_frame_4	8	K	VHIYCMIKPPKPLTSLQA	0.572222	TRUE	39	-37.2147	151.586
58bbebf4-bc5a-4471-b13e-64e387ce6ae4_frame_4	11	K	VHIYCMIKPPKPLTSLQAKVY	0.57619	TRUE	39	-45.703	126.046
58bbebf4-bc5a-4471-b13e-64e387ce6ae4_frame_4	19	K	PPKPLTSLQAKVY*SFCAFIT	0.166667	FALSE	39	-31.4422	131.711
58bbebf4-bc5a-4471-b13e-64e387ce6ae4_frame_4	38	K	ITLLWTANRDKI	0.241667	FALSE	39	-34.4111	143.81
