# Supplementary material
Source: Research Square preprint supplement (doi:10.21203/rs.3.rs-9266461/v1)
Supplement: Supplementary file 2 [file 2dcc435c76c11f55ac12a264.pdf]

## Lactylation Dynamics in Myxozoan Proteins

Amr A. G. Ibrahim, Juliana Naldoni, Antônio A. M. Maia, Juliano R. Sangalli, Caroline M. Meira, Rayline T. A. Figueredo, Beth Okamura, Paul F. Long, Edson A. Adriano

**Supplementary Figure S1. Original images of Coomassie-stained gels and immunoblots from Western blot analyses conducted on *Myxobolus macroplasmoidalis*.**

Original files – Whole lysate

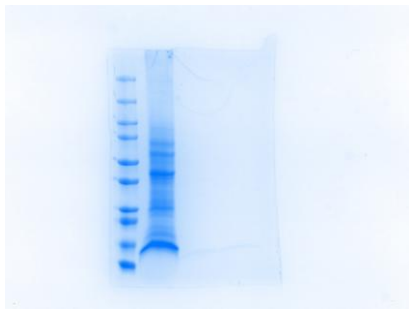

Coomassie parasitic lysate

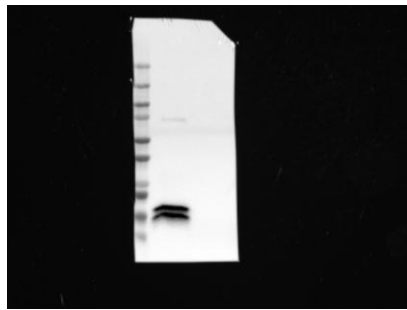

H3 total

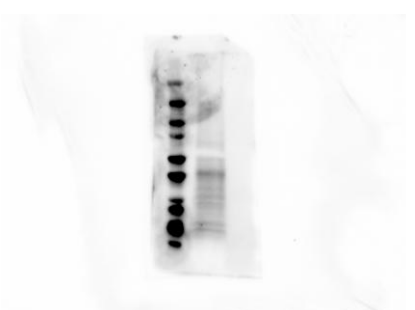

Pan Lactyl-lysine

Refers to Figure 4 - Coomassie blue-stained gel showing the proteins present in the parasite and immunoblots for total H3, Pan Lactyl-lysine in the whole cell lysate from the parasite.

Go to the next page.

Original files – acid extracted histones

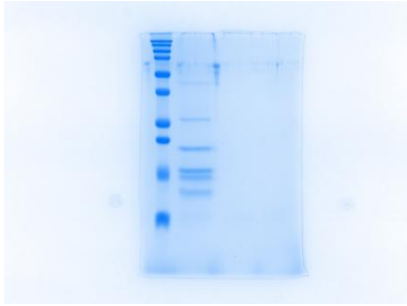

Coomassie histone

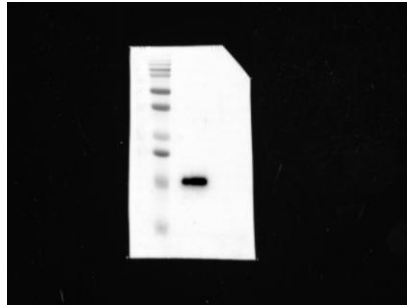

H3 total

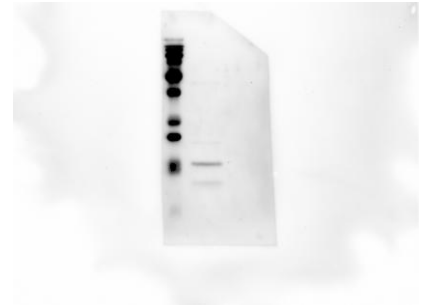

Lactyl lysine

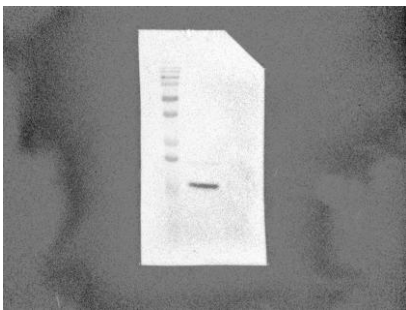

H3K18la

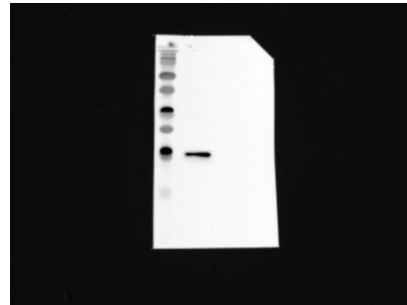

H3K9ac

Refers to Figure 5 - Coomassie blue-stained gel showing the enrichment for histone proteins and immunoblots for total H3, Pan Lactyl-lysine, H3K18la and H3K9ac in the acid extracted histones of parasite
