# Supplementary material
Source: Research Square preprint supplement (doi:10.21203/rs.3.rs-9266461/v1)
Supplement: Supplementary file 4 [file 5ab8818abba43583d6af8ccc.xlsx]

## Sheet: Sheet1
	Lactylation Dynamics in Myxozoan Proteins
				Amr A. G. Ibrahim, Juliana Naldoni, Antônio A. M. Maia, Juliano R. Sangalli, Caroline M. Meira, Rayline T. A. Figueredo, Beth Okamura, Paul F. Long, Edson A. Adriano
		Supplementary Table S6. The conserved 59 lactylated proteins in myxozoans. Excel table lists all lactylated proteins identified across the species used in this study
Lactylated Protein	Similar Protein names	Length	Sequence similarities	Protein families	Protein Sequence
Protein_001	DNA-(apurinic or apyrimidinic site) lyase (EC 4.2.99.18) (40S ribosomal protein S3)	245	SIMILARITY: Belongs to the universal ribosomal protein uS3 family. {ECO:0000256|ARBA:ARBA00010761, ECO:0000256|RuleBase:RU003624}.	Universal ribosomal protein uS3 family	MAVQISKKRKFVADGIFKAELNEFLTRELAEDGYSGVEVRVTPTRTEIIILATRTQNVLGEKGRRIRELTAVVQKRFGFPEGSVELYAEKVATRGLCAIAQAESLRYKLLGGLAVRRACYGVLRFIMESGSKGCEVVVSGKLRGQRAKSMKFVDGLMIHSGDPVNYYVDTAVRHVLLRQGVLGIKVKIMLPWDPSGKIGPKKPLPDHVSIVEPKDEQVPSTPISEQKGAKPEAAVVAPVTPVPTA
Protein_002	RanBD1 domain-containing protein	514			MCKMRSPTVTHLISLTEKHAIAPPVFVFQKDTAQKRTCLHTNWIISSVSSVSSSSYCPPAKRERTSSLTQFPPAHSVSKNNVFMPSSFCQSPTGNNNSDSEPEEKTVGFRLKPPTLIHGQAPSAGVPSQKPKELQRSVLRPAVLQAPLATKSLTQTGLNSGTNGVDRSSEGLPVTQNNTEKCDDTTTKNKDKSLSRSVQTFDKYWKTDPPVEYTFVFGQNVRAKLTLNNVVNSEQKGSTSAESGETNYFLQYRSTPSLQKAENKADDGDKFVFGQNMSDRVLSPLKCEQAAEGSGDPPTAPPCELPSKDSSPDKDNNVTGSLEESAAAYTKATAKRCLLEKVEVRTGEESESNVLQVQCKLFVFDKASQSWVERGRGLLRLNDMASTEEGSLQSRLVMR…
Protein_003	creatine kinase (EC 2.7.3.2)	381	SIMILARITY: Belongs to the ATP:guanido phosphotransferase family. {ECO:0000256|ARBA:ARBA00006798, ECO:0000256|PROSITE-ProRule:PRU00842, ECO:0000256|RuleBase:RU000505}.	ATP:guanido phosphotransferase family	MPFGNTHNALKMKYASSEEYPDLSQHNNHMAKILTPAIYERLRSKQTPSGFTLDDVIQTGIDNPGHPFIMTVGCVAGDEETYEVFKELLDPIIEDRHGGYKPTDKHKTDLNPNNLKGGDDLDPNYVLSSRVRTGRSIRGFCLPPHCSRGERRGVEKMSVEALDSLSGDLKGKYYALKNMTDAEQQQLIDDHFLFDKPVSPLLLASGMARDWPDGRGIWHNDTKTFLVWVNEEDHLRVISMQKGGNMKEVFNRFCTGLTKIETLFKDKGTSFMWNEHLGYVLTCPSNLGTGLRAGVHVKIPNMSKHAKFEEVLKRLRLQKRGTGGVDTAAVGGTFDISNADRLGFSEVELVQMVVDGVKLLVEMEKKLEKGQSIDNIMPAQK
Protein_004	Laminin EGF-like domain-containing protein	330			MEGTDRPACNPLTGECLCRVGVMGIFCDECAPGYDQVFPACLPCHPCAVLWADNVTDVHRAAQRMRTFIPPHREQLEPGHSRQLQRMLEMHSKLDYLGNLTGRSLPRVKDVEKLCVIISKLKDSIDPNAIIVDSSSLLNTEIDNIHHEFKMLLDNLRNKIGEAPKLDLKEMQEALEKIRKQHADFMADEKKVKEAERALENSMDTRQEIKDHLSSCSILGDMEGLEKKVKALSVAKLNKNICGGPGDEECSKSECGGALCRDFLGQRECGGPTCKGSFPVSHNATKTAEQVENDLIDLLQKLKDSKIKACSQILISALKWKNIYLIQNSI
Protein_005	V-set and immunoglobulin domain-containing protein 1	324			MSPTLRMALLFSMMGCGHLITVTVPEKFVNVTNGESALLQCTFVTTVQNTSNIIIQWSFVAKTSNVLQQVYYSQSGEDVISKPYEGRLNAPTYPATSNASITISNMQVSDAGAYTCEVHNFPDVNGKTEATIIVNILERPSVPFCAVHGDVESGHLVTLTCHSERGSPTPTYTWIRVDQDKTKTPVMGNPDPNIGSLYFRNISQFEFGEYCCSASNAVGSATCTVELSHELGDGAIAGAVIGALLGAVLIILIIWFMTHSMKKQKSKASKATEMQAIPKSSATVAYEGVPTRESGHQAYVTSGGVPMATNSHVHSDADGERAEA
Protein_006	RRM domain-containing protein	652			MNGKAKHEPNTRKERPQKRGGGRFEPYGNPSKRYRVFVSNIPYDVKWQALKDLMKEKVGEVTYVEHLMDGEGKSRGCAIVEFRTEELMKKAVEKVNKHNLNGRPLKVKEDPDGVIAQRDSHRAQGGGGGPPGGHGGMNMGMGMDHMNMERMNMDCMGPGPGGPPMVNIPPSLMNNSNIPNEIIHGLQAGKIGSTVFVANLDYKVGWKKLKEVFGMAGVVVRTDILEDKDGNSRGMGTVTFDMPIEAVQAVSMFNGQLLFNRVMHVKLDEKSLPKGDFAPQERPPALPRGLSGIGQGLGPGGQPIDATALNRGGGGGMGNMGPGGMDGMGFGGGMGRMGGMDNFGGGMNNMERYGPSGMGRMNEMDRGIGGAFDRECGRNEMGMSRNTFGESFDRGMGSS…
Protein_007	Peptidase S1 domain-containing protein	331			MLVCGTPPLNNKIVGGENAPAGSWPWQASLQTSDGHVCGGSLVNKAWVMSAAHCFSSSDPNGWNVSLGLQTLEGINPNEVSRTVAEIIIHPDYNDLTKDNDIALLRLSSPVNFTNYIRPVCLAASDSVFNNGTDSWVTGWGNVNEGVSLPSPQDLQEVEVSVVGNRQCDCLNGAGSITDNMLCAGDLAGGKDSCQGDSGGPMVIQQNSVWVQSGVVSWGQGCARPNLPGIYTRVSRYQSWIDGHIRTDKPGFVQFTSSGVDADSDYICSDGPTTTVDPNPYPYTHPYPYPYPYPYPYPYPYPYESIFDHGHILFSSLYLLSTLFILMFLTI
Protein_008	Ig-like domain-containing protein	481			MVLLCTFRLPLLLTCLAGTLASEREQGRTSEKTTPYGPSSVEINGVNTVTVEVPYGFQCSANCFPACTFTWTRGGLTTQGPELNLQLKEQVPPQVLICMATNPTTGKSVRVSKTVNVTAGPSNIKITGPDTLSSGVTSNFSCSADCYPSCSYTWTISSEAQSTVTTKHGQTISVTPDSWEIAEELICEAQDTVSLLYISTYVTPYVARGPEDISITGASSVTLGDTYNFVCFVDCTPSCNFTWTFNGKIFNGDEIQLPIFHKGHKPVVSSKLVVTVDEYRHNEALTCEAKNVASGVTAVSTKILSVTDPISVQPVSQDKPLAHQPFSLQCVGSQNPASILWLKNGLPIAVSGRVSLSPNNITMSFSPLLQSDGGLYQCIVSQGGAAIKGVGYQLNVNYG…
Protein_009	Suppressor of forked domain-containing protein	726			MAAEGSDSEDLNTNGLMEAPSALEAMEAVQLPTEKEEASEENGGGGASEAPEAAAATSYNMPLAENEEEEDGEFPADFDRLWKLAHDNPQDFSSWTDLLQYCEQESHMTASRQALVAFLARYPLCYGYWKKFADLERRAGYTNKAQEVCVQGLKAIPLSVDLWIHYINLLLGTLNMNLPESSQRIRSAFEEAVTAAGLDFHSDRLWELYIEWEKEQGDMKAATGVYDRVLRVPTQLYSSHYEKFKTHLNAHAPKDVLSAVEYEGLLEESKQSHKTEKSELAEGEEELPPGEEKEPTEEELIPKMRELLLARREKVYQDLEGEVRKRWNFEEAIKRPYFHVKPLDRTQLRAWHSYLDWELTELEGGGEKEVKTETEPEAMEGQEEEEKEGSKSSEIVAGG…
Protein_010	GB1/RHD3-type G domain-containing protein	497	SIMILARITY: Belongs to the TRAFAC class dynamin-like GTPase superfamily. GB1/RHD3 GTPase family. {ECO:0000256|PROSITE-ProRule:PRU01052}.	TRAFAC class dynamin-like GTPase superfamily, GB1/RHD3 GTPase family	MDSPMCLVKNADGELCVEPEAIDYLMGLKQKVVVVSVVGLYRTGKSYLMNKLAQKRSGFALGATIQSKTKGIWMWCVPHPEKTDHTLVLLDTEGLGDVEKGDSKNDAWIFSLAILLSSTLVYNSRGTIDNDAVEKLQYVNELTEMIKVKSSTVDEEEGEGSQFAQFFPNFVWTVRDFTLQLEIDGRVITPDQYLENSLQLKKGYGKKMNDYNLPRECIRNFFPSRKCFVFPSPTTPDNMHRLDSMDEAELSERFRAVADTFCRFIFQESRMKTVIGGHTLTGEMLGHLVTTYVETIAKGNVPCLENAVMAMAKIENQAAVDEGLAVYQKGMEDVKALFPVDINQLSENHLRSETQATKAFMKRSFKDDNGEFLKALVEAISNHTADLFKQNKDASEKKC…
Protein_011	Serotransferrin	691	SIMILARITY: Belongs to the transferrin family. {ECO:0000256|PIRNR:PIRNR002549}.	Transferrin family	MKLLLVSALLGCLATVYAAPAEGMVRWCVKSDKELQKCHDLAANVAQFSCVRRDNSLECIQAIKREEADAITLDGGDIYIAGLHNYNLQPIIAEDYGEDSDTCYYAVAVAKKGTDFGFLNLRGKKSCHTGLGKSAGWNIPIGTLVTVGQIQWAGIEDRPVESAVSDFFNASCAPGANKDSKLCQLCKVDCSRSHNEPYYDYAGAFQCLKDGAGEVAFIKHLTVPAAEKASYELLCKDNTRAPIDSYKTCHLSRVPAHAVVSRKNPELANRIYSKLMAVENFNLFSSDGYAAKNLMFKDSTQNLVQLPMTTDSFLYLGAEYMSTIRSLTKAQATGATSRAIKWCAVGHNEKVKCDAWTINSFTDGDSRIECQDAPTVDECIKKIMRKEADAIAVDGGEVF…
Protein_012	RRM domain-containing protein	959			MERGKALECEREEKERALEQKALQREKEERESVLEQDKERAMVAERESHLPPWKRGREIGLTPLPTPPLSTGAGRMAATEEGGEPHVPSLPQTASRDNQPVESGRPLSPTIATPLSPQSSFKKFRFLRDPPVLSPSCSASLVIKRPRTFSDSPHTQASALQSPRKPGEQEQESTLQGSKLSSGQAASQMPARQGFLVSGPTAADTTGPETPVIATLGKSPEEEKAKELVSEEHVLADKETNKQEVGEIARGAKRVDAGNVPSGPAESVVPPSPPPEEGNVDRGRERSQKKQEKQGRRASSSSDSSDSDSGSSSSSSSGSSSSSQGKTRTTPSGRKPEKPQTKTISQDKETVSQLEESKESPKAPQRKNRVPGVKDMTIDGARHGKKSFVGIPAGQDNEQ…
Protein_013	C2 domain-containing protein	136			MASLSLSLGLLVLCTLALVHCDLHDGPVRVYDIRASNLKGRFFSKPDPYVKVWCGSSFHGKSSILKKQENPTWPNQFNFADILHNSVLTLEVWDDVIGLDRHMGTCKITIRPGTHTETCHLKKGTVYYTYSYGYSH
Protein_014	Elongation factor 1-delta	177			MSGLQCLGEDNIWFEKPRYDEAERRFYEGANGPSTHSHHQVKSALQGRGRSRPQKRQHRNSSSASGDQELVSRMKSLELENQGLHKVVEDLRAALFKLENRVRVLERSPAIPCAKAVTVQSVKVEEDDDDEMDLFGSDEEDEEAERLKEERIAAYAAKKSKKPALIAKSSILLDVKP
Protein_015	PARP catalytic domain-containing protein	314	SIMILARITY: Belongs to the ARTD/PARP family. {ECO:0000256|ARBA:ARBA00024347}.	ARTD/PARP family	HFSRGVFNNGLVTMDVNPDSPYYINLLDSKTHPEDHREYVMFHGCSKEGAEFIKREGFKPSRADISMLGAGVYVSRDIRKACKYPLDVPDSEKRVLKIRVDVGRVKVIDRQNHPMQKTWHTVHGFDTAWVPPNVGMVASNQQENCVYDPKRIKVIEVMKVTEENLSQYDHLQSGVSPEDSHVYVMYHGTSKQAAIDIQRNGFTPSKVGMLGAGVYLSRDIRKVIRYPLGSSDSNRMVLKVKVNVGRVKVINKKGHDMQYNWHTHGFDTAWVPPGVGMVPSNQEEDCVYDPKRIKVMAMLDVANLKKVNPWLNIV
Protein_016	Slingshot protein phosphatase 1a	156			MELTITLLNGDSHPLTVQPHTTLGSLKSLINQHFGVAMERQRLSGVNGNNISLSDDSKTLSDYGLHSGSKVMVLITEPTHIQVFLKNEKGQTHTYEVVSGETVTQFKAKVQNKEGVPADQQRLIHEGKQLDDRKKLEDYGVRNLSTIHLTLRLRGG
Protein_017	Histone H3	189	SIMILARITY: Belongs to the histone H2A family. {ECO:0000256|ARBA:ARBA00010691, ECO:0000256|RuleBase:RU003767}.	Histone H3 family	MRKKSLPQKSQKPKTILVTSTPMVSQPPQKTKKDDTIFSDQDENYNPKLTEKSKGKKVETQKTKILTSKNPKVETRPSKPPIIITKKPIENKMTKELKNRVFKEIQFYQKSTQTLIPNAPFARLIKEIARDLGYLDKRFNLCALLALHEASEAFLVRLFEHTNLCAIHAKRVTIMKQDMKLVEKITKDT
Protein_018	Heat shock cognate 71 kDa protein (Trinotate prediction)	305	SIMILARITY: Belongs to the heat shock protein 70 family. {ECO:0000256|ARBA:ARBA00007381}.	Heat shock protein 70 family	KTFFPEEISSMVLVKMKEIAEAYLGCQVADAVITVPAYFNDSQRQATKDAGVIAGLNILRIINEPTAAALAYGLDKNSGQGINVLIFDLGGGTFDVSILYIDDGVFEVKSTAGDVHLGGEDFDTRLVNHFIEEFKRKNKKDIMGNKRSVRRLRTACERAKRTLSSSSTANIEIDSLFEGIDFYSTITRARFEELNSDLFRSTLDPVEKALRDAKLSKADIHDIVLVGGSTRIPKIAKNLEEFFGGRELYRTINADEAVAYGAAVQGAVLKGDKSDTIKDLLLLDVAPLSLGIETAGGVMTPLIKR
Protein_019	DNA-(apurinic or apyrimidinic site) lyase (EC 4.2.99.18) (40S ribosomal protein S3)	250	SIMILARITY: Belongs to the universal ribosomal protein uS3 family. {ECO:0000256|ARBA:ARBA00010761, ECO:0000256|RuleBase:RU003624}.	Universal ribosomal protein uS3 family	MTRPKMAVQISKKRKFVADGIFKAELNEFLTRELAEDGYSGVEVRVTPTRTEIIILATRTQNVLGEKGRRIRELTAVVQKRFGFPEGSVELYAEKVATRGLCAIAQAESLRYKLLGGLAVRRACYGVLRFIMESGSKGCEVVVSGKLRGQRAKSMKFVDGLMIHSGDPVNYYVDTAVRHVLLRQGVLGIKVKIMLPWDPSGKIGPKKPLPDHVSIVEPKDEQVPSTPISEQKGAKPEAAAVAPATPVPTA
Protein_020	3-hydroxyisobutyrate dehydrogenase (HIBADH) (EC 1.1.1.31)	319	SIMILARITY: Belongs to the HIBADH-related family. {ECO:0000256|RuleBase:RU910714}.	HIBADH-related family	IRRTPFKMCSRSMASKTPVGFIGLGNMGSPMAKNLLRHGYPVIATDVFPESCKELQDEGAQILDSPAEVADKADRIITMLPSSPNVIEVYTGPNGILKKVKKGTLLIDSSTIDPSVSKEMALAAEKMGAVFMDAPVSGGVGAASLAKLTFMVGGVEEEYTAAQELLTCMGANVVYCGQVGTGQAAKICNNMLLAIGMIGTAETMNLGIRLGLDPKLLAQILNMSSGRCWSSDSYNPVPGVMEGVPSGNNYQGGFGTTLMAKDLGLAQHTATNTKTPVPLGSLAHQIYRVMCARGYANKDFSSVFQFLREQEEEPEKKGD
Protein_021	NACHT domain-containing protein	972			SMKSDWSMDRPIVFRKGDFSTKQRKHLVSCLTYLLYLFQLLEEKIMTFVKNELKLFKRILSPELPEGFERQKQEVEDAEEEKQESSAREGALKITLHILRKMNQKELADTLEKYELAVICQRELKSNLKKKFQCVFEGIAKQGNPTLLNKIYTELYITEGGTGEVNNEHELRQIETTTRKQARPETPIKCNDIFQSLTGQDKLIRTVLTKGVAGIGKTVSVQKFILDWAEGKANQDVQFVFSFPFRELNLMKEDKHTFIELLNHFSMETKQSGISNYNKYKVLFIFDGLDECRLPLDFQKNKICWDVTESTSVDVLLTNLIKGSLLPSALLWITTRPAAANKIPSGCVDQVTEVRGFNDPQKEEYFRKRFSDQDLASRIISHIKTSRSLHIMCHIPVFC…
Protein_022	All-trans-retinol 13,14-reductase (EC 1.3.99.23)	609	SIMILARITY: Belongs to the carotenoid/retinoid oxidoreductase family. CrtISO subfamily. {ECO:0000256|ARBA:ARBA00005855}.	Carotenoid/retinoid oxidoreductase family, CrtISO subfamily	MWIIVAIICAALAAFVYNYVFRTSGPNPFDIDTREPLKPLVTQKKEKNKVLKQGFLASKVPEKLDAIVIGSGIGGLGLAVLLAKVGKRVLVLEQHDRAGGCCHTFTEKGFEFDVGIHYIGDLLEHKPFRCMLDQLTNGQLQWEPLDNPFDQVVLGPPENRRTYPIYSGRNRFPDELKKFFPGEEAAIDEYMRLVKKAGRSVWFLCLLKLVPVPLAKFLVYTGLANRLSFFFRMASRSVTEVVNELTENNDLRAVFSYVFGTYGNMPKDGSFSMHSLLVCHYLTGAWYPIGGASEIAYHMIPIIEKAGGAVLVRAPVNRILFNDNKEAIGVSVMKGQEEIHVHAPMVISNAGIFNTYQKLLPKELQAMPAIQKQLGMMKNGAGGLSIFVGLTGTKEDLGL…
Protein_023	Alanine--tRNA ligase	999	SIMILARITY: Belongs to the class-II aminoacyl-tRNA synthetase family. Alax-L subfamily.	Class-II aminoacyl-tRNA synthetase family. Alax-L subfamily.	MDSTLTASEIRQRFIDFFKRNEHTYVHSSATIPLDDPTLLFANAGMNQFKPIFLNTIDPSHPMAKLSRAANTQKCIRAGGKHNDLDDVGKDVYHHTFFEMLGSWSFGDYFKELACKMALELLTQEFGIPIERLYVTYFGGDEAAGLEADLECKQIWQNLGLDDTKILPGNMKDNFWEMGDTGPCGPCSEIHYDRIGGRDAAHLVNQDDPNVLEIWNLVFIQYNREADGILKPLPKKSIDTGMGLERLVSVLQNKMSNYDTDLFVPYFEAIQKGTGARPYTGKVGAEDADGIDMAYRVLADHARTITVALADGGRPDNTGRGYVLRRILRRAVRYAHEKLNASRGFFATLVDVVVQSLGDAFPELKKDPDMVKDIINEEEVQFLKTLSRGRRILDRKIQS…
Protein_024	Fibulin-1	688	SIMILARITY: Belongs to the fibulin family. {ECO:0000256|ARBA:ARBA00006127, ECO:0000256|PIRNR:PIRNR036313}.	Fibulin family	MGPGIVILFSLFGVLNGQGGKQMSIEECCKDGRDRGIDNQDCTALPLISESTTCRIVQEQCCATVLEDSICTNGINMAKDQGGCDTQFPGSTCETKTTRMCCDCCLLGRAAQEKGLPCDHSLSLGYQCGLVSRACCDDGAPDVKTITLVPDKDNEALTGKDDPLLNECSNAKCAQECVGNGTCACFKGYKLKPDGKNCEDINECLLGASNCRGGERCINTLGSFRCQREVSCGTGYELTDSNNCKDIDECESGTHNCAPDFMCQNTQGSFRCRPKNQCGDGYIQDALGSCIDINECLAQTGPCHPGQSCMNTVGSFTCQRNSVNCGRGYHLNDNGNRCVDIDECKGPDGECAGHGCINLVGSFRCECKIGFIFNSISRVCEDINECRHYPGRLCAHKCE…
Protein_025	TLDc domain-containing protein	497	SIMILARITY: Belongs to the IFI44 family. {ECO:0000256|ARBA:ARBA00009243}.	IFI44 family	MSLSTLHSFCSFLGACLYSEVRFISMMGFCYYLLLVFLPQVLSDIMSVVKSSLSVEQEKKLLSLFGHVRLHLLYKASVHSYMHSAFHNRCDGQGPTVLVAYNKAGFVFGGYISKNYAQTNQAINDDKAFLYSITDQREKPLRVSSTDGQYGFTDGKNGLNVGVLWFLNNNTSTVQIVAGNSYTFEGEEMHGNDLQLTECEVYRVEDCGGLLKTPWREIDWEGYSNKERLMDYIKNYKPEVKSVFQARVLLVGPVGAGKSSFFNSINSVFKGHVTGQANTGSAGTSLTTQFRTYSIKADQGRKALPLVLCDTMGLEEGHSAGLDIDDVNSILKGHVQDRYQFNPSMSVQTDGVGFCKSPSLKDTIHCVVYVLDACKFTLLSAKMVDKLAAIRKGINKQGV…
Protein_026	Clathrin heavy chain	1634	SIMILARITY: Belongs to the clathrin heavy chain family. {ECO:0000256|ARBA:ARBA00009535, ECO:0000256|PIRNR:PIRNR002290}.	Clathrin heavy chain family	MVTQHLYFMCCGVFQLQNLGVNPANIGFSYLTMESDKFICIREKVGEQNQVVIIDMADPNNPSRRPISADSAIMNPTSKVIALKAAKCLQIFNIEMKSKMKAHTMTEEVMFWKWISVNTVALVTEAAVYHWSMEGDSQPIKVFDRHASLAGCQIINYRTDEQQKWLLLIGISAQQNRVVGAMQLYSVDRKVSQPIEGHAAAFGEFKVEGNTKASTLFCFAVRSQAGGKLHIIEVGHPATGNQPFTKKAVDVFFPPEAQTDFPVAMQIGTKHGVIYLITKYGYIHLYDLESGVCIYMNRISAETIFVTAPHEPTSGIIGVNKKGQVLSVCVEEENIVNYATNVLQNPDLGLRMAMRSNLAGADELFARKFNTLFAQGSYSEAAKVAASTPKGILRTAETI…
Protein_027	Sushi domain-containing protein	463			MGEPKCLFFVLLIWCLGTVHAQDSKQSCQKLKLKQGYFGSDEETYRHGTELYYACDKGWKPAVEGWWAMVKCENRKWSNTPQCIDENDCIAPDNPNAKVKTPEVKGWYPNGKVVWFECDGTYEIEGPITAKCENGTWTKLPLCEEKEVSCGQPPLVTNAVITHEYQEKFQEGSKINYKCRDSYTYEGTDSSVCQSGDWTISPKCIQTPSPTERASTGDGGSSTSSDRGNGGTSSGGDHRTSSGGGHSTSSGGGHSTSSGGGHSTSSGDEASLNVRPSARPQPGGPFLPVDRCGEKPTVDNGDFISDSDRNRMALTFTCINYYKLVGPEQVMCHNDQTWSELPICKAPCTIDKMTFDMLDLTKDMFVKEGESQTFLCKVTDSWKQPFVADVRCQNGRGEI…
Protein_028	Serine/threonine protein phosphatase 2A regulatory subunit	447	SIMILARITY: Belongs to the phosphatase 2A regulatory subunit B56 family. {ECO:0000256|ARBA:ARBA00009745}.	Phosphatase 2A regulatory subunit B56 family	MSSAATTPPSVDKVDGFSRKSVRKAKQKRSQSSSQFRSQGKPIELTPLPLLKDVPAPEQPELFLKKLQQCCTVFDFMDTLSDLKMKEYKRSTLNELVDYVTVSRGYLTEQAYPEVVKMVSYNIFRTLPPTDSNEFDPEEDEPTLEASWPHLQLVYEFFIRFLESQEFQPSIAKKYIDQKFVLQLLELFDSEDPRERDYLKTVLHRIYGKFLGLRAFIRKQINNIFLRIINGFALPLKAEHKQFLVKVLIPLHTVRSLSLFHAQLAYCIVQFLEKDPALTEPVIRGLLKFWPKTCSQKEVMYLGELEEILDVIEPTQFVKIQEPLFKQISRCVSSPHFQVAERALYYWNNEYIMSLIEENSSVILPIMFASLYRISKEHWNPAIVALVYNVLKAFMEMNS…
Protein_029	UPAR/Ly6 domain-containing protein	207	SIMILARITY: Belongs to the CNF-like-inhibitor family. {ECO:0000256|ARBA:ARBA00006570}.	CNF-like-inhibitor family	MHLIVPILVSVLLPKAYSLKCFECIPGESEACTNKQTDCLYPAQCGSSRIISYAGDIKLLDINAKSCAVSAECLSASVNFGIARTTIASKCCNTDLCNSQSVPESTKGLPNGKTCFTCTGTDCTSTLSCLGDEDRCISTTVNTGGEKISMKGCASKSICMGDVSQALGSAIGMEMKCCEGNLCNNAQSIGLSLLILVTSMVSVTLFY
Protein_030	Fibulin 7	443			MALSMLRSGLLFLCLTTIHTCNGGGQNCMDKHQVVGVLRQMEKFLKGQEMRFTEGLRIMKSKLATLQNSVSKLPQADQSAAPSVCPSLEAPVHGTKFGSKYFISHEVHFTCSHGYHLVGPGTRVCQENGSWSGVNTICKDVSECSSNPCQNGGTCVEGVNQYKCTCPQSWSGSSCQHQTQTAPPEWSVMNDPAFSRRPRCAKVDRAQHCSCDAGFHMSGTSDNSICQDVNECEVYRLDQGGKLCVYECVNVPGSYQCSCPRGYKLLPDGRSCEDVDECLTQQHNCSRGTTCINTGGGFQCVSPECPRSHGNISYVKTSPFQCERNPCPMESRSCHLAPKTVSFHYLSLPSNLQTPATLFRMATAAAPGRPGPDSLRFGIVGGNSRGMFVMQRSDRQTGE…
Protein_031	ATP synthase peripheral stalk subunit F6	368			MSAKMAASLLRIVRLGSTKCVQAERWSAPAAAALSTKAGGPKKPKKSSSGKKSQGKTYFDLEKLVPHRKYVEFPKKEMTPAAAVELVAAPKPVEAAAAEPMVAAAKAVPAPAAVEATPVVDTVAPATEAIVESAALVAKATPVVEAAASVAEDAPVAAEAAPIFEASSAADTPVEAVPEAAAPAEAVAEAAPVEAAPVEAAPVEAAPVEAAPVEAAPVEAIAEVLVESATIEAAAEALVEVVAEVVTVAAPIEAAAEALIEAVAEVVAEAAQVESAAEELIAEPPAEAERIEAPEVQLDPIQKLFLDSIREYSSKSVASGGLVDAGPAYEKNLAEELTKLQRLYGGGDITAFPEFKFTEPKLEEVAPK
Protein_032	NADP-dependent oxidoreductase domain-containing protein	317	SIMILARITY: Belongs to the aldo/keto reductase family. {ECO:0000256|ARBA:ARBA00007905}.	Aldo/keto reductase family	KMTPTPTVTLNTGASMPIVGLGTWRADAGKVAEAVKAAISAGYRQIDGAYYYQNEDEVGDGIHTMIGQGVVKREELFIVSKLWCTLHQKSMVKGACQKTLSDLRLDYLDLYLIHSPMCFQPGENLFPFGEDGQVIAGDSNFLDTWEAMEELVDAGLVKAIGVSNFNKDQIESILNKPGLKYKPANNQIECHPYLTQEKLINYCHSKGISVTGYSPLGSPDRPWAKPGEPSLLEDPKIKAIAVKHNKTTAQVLIRFQIQRNVIVIPKSATPSRIKENFQGVLTQNPEGVGCSEVKSLPLFPLFPLFSVSMSNIQRAVF
Protein_033	PARP catalytic domain-containing protein	154	SIMILARITY: Belongs to the ARTD/PARP family. {ECO:0000256|ARBA:ARBA00024347}.	ARTD/PARP family	MWAEDDFSLPSGVVRLGQSEPQDGYTYIMYHGTTKQAANQILNTGFRQSAGGMLGRGVYLSRDLQKASRYPLDHPENQRVVIRVKVNVGKVKRIDSQYHALRTTWHENGYDTAWVPPNCGMVKSGLEEDCVWDPNRITVLDFIQPKMVRCQRSR
Protein_034	Synaptopodin	1146	SIMILARITY: Belongs to the synaptopodin family. {ECO:0000256|ARBA:ARBA00038161}.	Synaptopodin family	METERGHMSVRRGVSWSPGGGRKSLQVGQGRDVDTGNRESNASWEKRDYRGIKGQVTSTSTNQLARKTNLTRSASLSEKELKEARVRSQIIAAQLTVPSGCSNSRGVQLFNRRQQRVNAFTLESCGERTREEEREERDGDTRNNNLTWEEDRGGPSEGTETDRQLNCCGTKQPLWSPPSGSEVTGSDIMKDPGDEHIYEEVETVTQERHFQPVNERQGEEEERSGEREREEIYEDIEGEVKDEIISVNDNNTGPVREEVGMNRGSYTYPTAPPETRNGFHSTQGSAGEIQNGGRVSMSLSRQAPTIVNRTARPFFSPPTVQPKSPKARSPVMDNNIPPAPSYPTPTLPPATSDSTPPLPPFTATRPVAFSPPPPPPSYPMPPLPAFPIHPPPPSQSLSS…
Protein_035	Succinyl-CoA:3-ketoacid-coenzyme A transferase (EC 2.8.3.5)	554	SIMILARITY: Belongs to the 3-oxoacid CoA-transferase family. {ECO:0000256|ARBA:ARBA00007154, ECO:0000256|PIRNR:PIRNR000858}.	3-oxoacid CoA-transferase family	MATLERITFSNSRGFSIVCCFISHPQMCGCSYSTSSQRNSQFYTDPTDAVKDIPSGATILVGGFGLCGIPENLINSLLKTGVKSLTAVSNNAGVDNFGLGLLLQTKQIKRMISSYVGENIEFERQYLSGELEVELTPQGTLAERIRAGGAGVPAFFTATGYGTLVQEGGSPIKYNKDGTIAIASEQREVREFNGRHYIMEKAITGDFALVKAWKADKAGNVIFRKTARNFNQPMCKAAKVTIVEVEEVVDVGTFAEEDIHIPSIYIHRIIKGGSYEKRIERRTVQKAQAEKPKPKKDSDIVRERIIRRAALEFEDGMYANLGIGIPMLASNFIQPDITVHLQSENGILGLGPYPTEDEVDADLINAGKETVTVLPGASYFSSDESFAMIRGGHINLTML…
Protein_036	RRM domain-containing protein	665			MSRDRFNINVRGNNRGAGFQRRGAGPGGPMRGGMGNLNNFRQNQHPFQRGPHPGNFGKPPNQIRPMTPQKPMPPTISQPGAQPIRPPPTPGPALTMKGPVQQQQAAAAAAPPATVAAPPAPTATTPATAAPVAAPPAVATAPPKAAAAPPKAAAAPPKAAATPPAAAAAAPIGQPKMQSPPPKPVPPKPAISSPPPNQMKKPALSSPPPNQMNRNQQRPGNANGNGHKSAPFNKKPEPQTQNTQMEAEEAQHPKELRATLSSLRRPGEKTYTQRCRLFIGNLPNDISDDTFKKLFAKYGEPSEIFINKNKGFGFIRLESRALAEIAKAELDDVPMKGRPLRVRFATHSAALSVKNLSPFVSNELLEEAFSQFGVVERAVVIVDDRGRSTGKGIVEFASK…
Protein_037	Interferon-induced GTP-binding protein Mx	662	SIMILARITY: Belongs to the TRAFAC class dynamin-like GTPase superfamily. Dynamin/Fzo/YdjA family. {ECO:0000256|RuleBase:RU003932}.	TRAFAC class dynamin-like GTPase superfamily, Dynamin/Fzo/YdjA family	MVKNRFPGITISTDPVQPVVSCSVVSCSCSVLTVFFFLSQIMNYTLNQHYEEKVRPSIDLIDSLRSLGVEKDLALPAIAVIGDQSSGKSSVLEALSGVALPRGSGIVTRCPLELKMKRKKEGEEWHGKISYQDREEEIEDPSDVENKIRKAQDEMAGVGVGISDDLISLEIGSPDVPDLTLIDLPGIARVAVKGQPENIGEQIKRLIRKFIMKQETISLVVVPCNVDIATTEALKMAQEVDPEGERTLGILTKPDLVDKGTEETVVDIVHNEVIHLTKGYMIVKCRGQKEIMERVSLTEATEREKAFFKEHAHLSTLYDEGHATIPKLAEKLTLELVHHIEKSLPRLEEQIEAKLSETHAELERYGTGPPEDSAERLYFLIDKVTAFTQDAINLSTGEE…
Protein_038	Interferon-induced GTP-binding protein Mx	621	SIMILARITY: Belongs to the TRAFAC class dynamin-like GTPase superfamily. Dynamin/Fzo/YdjA family. {ECO:0000256|RuleBase:RU003932}.	TRAFAC class dynamin-like GTPase superfamily, Dynamin/Fzo/YdjA family	MNNTLNQHYEEKVRPCIDLIDSLRSLGVEKDLALPAIAVIGDQSSGKSSVLEALSGVALPRGSGIVTRCPLELKMKRKKEGEEWHGKISYQDHEEEIEDPSDVEKKIREAQDEMAGVGVGISDDLISLEIGSPDVPDLTLIDLPGIARVAVKGQPENIGEQIKRLIRKFIMKQETISLVVVPCNVDIATTEALKMAQEVDPEGERTLGILTKPDLVDKGTEETVVDIVHNEVIHLTKGYMIVKCRGQKEIMERVSLTEATEREKAFFKEHAHLSTLYDEGHATIPKLAEKLTLELVHHIEKSLPRLEEQIEAKLSETHAELERYGTGPPEDSAERLYFLIDKVTAFTQDAINLSTGEEMKSGVRLNVFSTLRKEFGKWKLHLERSGEIFNQRIEGEVDD…
Protein_039	Caldesmon 1b	403			MAKREERRQKRMMDALEREKDQNPGSAGNHGSGENSVDERSVGRRGRYQDNEEEVEERNCRKEEEGKAAPEEEEAEQGEEEEEEVVEEKPRRSYMREQVNEKQNGGLHEETPPKHKKTERTLSRGSVRSPEVGAEEEQDDAANLEAERKLEELKRRRGDAESEEFERMRRKQQEAEQELEALKKKREERRKIIEEEERQKKQEEAEKKDREEEEKRRMKEEIERRRAEAAEKRQQMGVETVDGEAKPFKCFSPRGSSLKIGERAEFLNKSAQKSTVKTSHSPVVSKIDNRLEQYTSVAQNKDMRSPRSGAVDLPMVTDGIRNIKTMWEKGNVFNSPGGGGGTYKEAAGMKIGVAGRINDWLNKTPESKTPGGRPADLKPGDVTNKRSLWENKGSSPAKV…
Protein_040	Electron transfer flavoprotein subunit alpha (Alpha-ETF)	330	SIMILARITY: Belongs to the ETF alpha-subunit/FixB family. {ECO:0000256|ARBA:ARBA00005817, ECO:0000256|PIRNR:PIRNR000089}.	ETF alpha-subunit/FixB family	HRFRYICSCFRLVIGLILPRFQSTLVVAEHNNDKLTPITLSAITAAKKLGGDVPCLVAGTDCAKVAQEVSKVLGVKTVLIAQNDAYKGSLPEELTPLILATQKQFNFTHICAGASAFGKNLPPRVSAKLDVAPISDIIEIKAPDTFVRTIYAGNALSTVKCNDNVKVFTVRGTSFEPTEVDGGSATSEEVAVSASAGMSEWLEATLTNSDCPELTRAKVVVSGGRGLKNGENFKLLYDLADKINAAVGASRAAVDARYVPNDMQVGQTGKIVAPELYIAVGISGAIQHLSGMKTIVAINKDPEAPIFQVVPSLMPLMPSYSQILIGLSMN
Protein_041	Ryanodine receptor 1 (Skeletal muscle calcium release channel) (Skeletal muscle ryanodine receptor) (Skeletal muscle-type ryanodine receptor) (Type 1 ryanodine receptor)	5031			MWEQQVQGSEIEGREERDDQVVLQCTASILKEQIKLCLSCEGFGNRLCFLETTSNAQNVPPDLAICCFILEQSLSVRALQEMLSNTMELNESSQGGGHRTLLYGHAILLKHTHSSMYLSCLTTSRSLTDKLAFDVGLQEDSTGEACWWTIHPASKQRSEGEKVRVGDDLILVSVSSERYLHLSYASGDLMVDASFMQTLWTMSPVMSGCELAEGFLTGGYVLRLFHGHMDECLAIPAAEQGDDQRRIAHYEGGAVCSHARSLWRLEPLRIGWSGGHMKWGQSFRVRHITTGRYLCLDEEKGLLVVDPEKANAKMSAFCFRISKEKIEVAQKRDVEGMGTPEIKYGESMCFVQHVSSGLWLTYASVDAKSARLGPLKRKAILHKEGHMDDALTVARSQTE…
Protein_042	Ig-like domain-containing protein	101			AFPSSTPSLHLETPRFRTVMTQTKVTATCVVHSAYDAKVSWLLDGKDPTSRTPVNQASSTTQSISSNLTLPSSQWKTLNTITCRAEHRCFNSTEKTRNVKG
Protein_043	Desmoplakin SH3 domain-containing protein	1958			MFSKKKEYDLVKVAQSQGNDVAVLVARMQSNADRVEKNVLRSEELMAVDTVNDKKDRPLLHQKENTEILAEAEGLLKDLFLDVDRAKKLSHPQAGEIEIDVRNLHDRWSKDCTMYRDLYEAVQEVELTPRIDWSQVLEEKQKQISAERYGPNLSDVEKQIASHNILHQEIEAYGSQMNRSSTGSPVTTTKQYTDLLEASLWRHRYLASLYDYMQGCSKELVYLSEYQERILRKDWSDHMLDPPGVRMEYEKFKNNTLLTHESETKQLQMDGDRLVEMKHPASSTIRAHSDALQNEWQSFLNLCICQEVHLDNIDNYRKYQLDVETLSESMKRLNSNLDPKSLNNKKNPEILLQLERAIERNEQRLVALREFSSTIAPLKLRRIRPTKPTPVLSLCEWTN…
Protein_044	DNA helicase (EC 3.6.4.12)	1847	SIMILARITY: Belongs to the SNF2/RAD54 helicase family. {ECO:0000256|ARBA:ARBA00007025}.	SNF2/RAD54 helicase family	MSSPEPMETPEVDRDEERAVPHSDSEGSDYNPGKKKKKNRGGTSKEKKRSSTSADRNGGGKDKRKDPEPEEEEDEDDDDDSSEPKTSSQLLDDWGMEDIDHVFSEEDYRSLTNYKAFSQYVRPLIAAKNPKIAVSKMMMVLGAKWREFSTNNPLRGSAAANAALAAANVSAAVDSMVAEVAPPPAPVAEPQLPPAPPLKKAKTKEGKGPNARKKSKPTPKPVEKKKVATKKVAPLKIKLGGFNSKRKRSSSEEDEPDVESDFDDASMNSVSVSDGSNSRSSRSKKPKSKPKKKKVEEDGDGYETDHQDYCEVCQQGGEIILCDTCPRAYHMVCLDPDMENAPEGTWSCPHCEKEGKQWEAREDGSEEEEEEVEPEPEEDDHHMEFCRVCKDGGELLCCD…
Protein_045	Integrin beta	790	SIMILARITY: Belongs to the integrin beta chain family. {ECO:0000256|ARBA:ARBA00007449, ECO:0000256|RuleBase:RU000633}.	Integrin beta chain family	IHLKHESTLCIKNDCIKANAQSCGECIQVAEKCGWCTDTDFLKQGESKSARCDELQSLITKGCTKAKIENPRGSTFINKNKAVTNRKKDMAEKLKADQITQIQPQKLTLNLRSGEAQTFKLKFKRAEDYPIDLYYLMDLSFSMKDDLENVKNLGTDLMREMKEVTSDFKIGFGSFVEKTVMPYISTTPARLLNPCTSTNNDTCTSPFSYKNVLKLTENGEEFNSLVSKQQISGNLDSPEGGFDAIMQVAVCGNAIGWRNVTRLLVFSTDAGFHFAGDGKLGGIVLPNDGKCHLENNMYTMSHYYDYPSIAHLVQKLSDNNIQTIFAVTEEFQPVYKELKNLIPKSAVGTLSSNSSNVIKLIIDSYNSLSSEVILENGKLPEGVSITYKSICKNGWVGTG…
Protein_046	C2 domain-containing protein	168			MSVVLFSSSYGHKNISSPLLFYLLSFRQCTMASLSLSLGLLVLCTLALVHCDLDDSHVRVWGLSASNLKGDFLSQPDPYVKVWYGPAFGGMSSILKNQANPTWPDEFNFLDMIHNSVLKLEVWDDIVGLDLHMGTCKIPISPGTHSEICQLKRGTIFYTYSYGYVYSY
Protein_047	VWFD domain-containing protein	5194			MTMGTTQTPTWVLIWMALAIGLTASQSEDTSKATVNIIPSMSRIPEIAGVSPIHNGQVCSTWGNYHFKTFDGDIFQLPSTCNYVVTSLCHSSYEDFNIQMRRQVVDNQPTISKITMKLDGTVVELSKGSVVVNGNNATLPFSQSGILIEETPSYIKIKAKLGLVAIWNQDDSFLVEMDIKFRNKTCGLCGDFNAIQQFDEFYSHGMKLSAVDFGNFWKLDGPTESCTENILPSNQKCPNLKPVCEQLLSGPAFSSCKDLLAIDSFVEACVSDLCHCDNSTNSFCLCNTISEYSRQCVHAGGKPKQWRTEQFCYKTCPFNMEYQECGNPCVDTCSNPERGQLCEEHCSDGCFCPPGTVFDDVNKNGCIALSQCSCRHNGKTYAPGESYSSTCKDCSCAGG…
Protein_048	Cytidine monophosphate (UMP-CMP) kinase 2, mitochondrial	419	SIMILARITY: Belongs to the thymidylate kinase family. {ECO:0000256|ARBA:ARBA00009776}.	Thymidylate kinase family	MARRMMSRLGQWSSYVFAVDFDTNSDPIYFALASKQSERPQVFRNVLADEKCYSLHVQSDDKIERAKFYGGLKKKLSKELPPECTILEMSIFQPNVKDSVIKGYFLKDASKSSATERVLGELLRNDPVYVCSYLCGGEDRQWSQHLWSNTEDGWVEVLEKYCVVPAEKPVHHPSTLSIINYDVFYSFEDAYKVLQQCVDIIPESKAVLELVDQRLESKEKTDFPVIVIEGLDATGKTTLTESLTEALGATLLKSPPQCLSPWRARFDTEPPLIRRAFYALGNYLTAGQIGQEARQAPVIVDRYWHSTAAYAIATAVGGKLGNLPQAGSEVYGWPGDLLRPSLVLMLSLSSQERMRRLQVRGQDKTMEEEELEANHLFRQKVEEAYQRIEGPACITVDAS…
Protein_049	Derlin	147	SIMILARITY: Belongs to the derlin family. {ECO:0000256|ARBA:ARBA00008917, ECO:0000256|RuleBase:RU363059}.	Derlin family	LLLYNYLLMIPLIMSVLYVWAQLNRETIVSFWFGTRFKACYLPWVILGFNYIIGGSVVNELIGNLVGHLYFFLMFKYPMDLGGRSFLSTPDFLYRFLPNRRGGVSGFGAPPSRRPAAPEAGGGGGGGGGGGMGGRHAWGAGFRLGDD
Protein_050	protein kinase C (EC 2.7.11.13)	766	SIMILARITY: Belongs to the protein kinase superfamily. AGC Ser/Thr protein kinase family. PKC subfamily. {ECO:0000256|ARBA:ARBA00005490}.	Protein kinase superfamily, AGC Ser/Thr protein kinase family, PKC subfamily	MHQTAQQMLQDSKTKIDIIRMQIRKAMQATEQTEDIQGKPDTCGVELRVEELWHHYRVEHAMAEGAKNMLRLLGVGKVQDKKAMSEAQCGLSESSQRCDLLRGSLEQRLLELTDDHPKACLIKEELVLASSSAFSSRHGTPYVHNQYSTLCKPSPLTGTLQVRLLGCVGVLEVVPGRSRGTPVVLPCYIPGDGRSFKLSGLYSRSTSSMSLRIPGKTDELSSEVSAVLKLENTVVGQTCWKTVGEQAWDQTFTVELERSREMEIAVYWRDYRSLCALKYLKLEDFLDNQRHKVQLELEPQGLLLAEVMFFNPVIERGPRLQRQKKVFSKQHGKAFLRARQMNVDIATWVRLLRNAIPTGNNVPSYTPHTHSRSHSGEISVEKLTLESDSPPRPEIRRDV…
Protein_051	Uncharacterized protein	92			MPLPPCCLDPSLHVVVPLPPCCSGCSTTSQKHRNFVSEPMGNRSVRDVPGIGPVQGRRLEEQGINRQVHYIGIRCNYQVGALHRNTVCTTCV
Protein_052	small monomeric GTPase (EC 3.6.5.2)	278	SIMILARITY: Belongs to the small GTPase superfamily. SAR1 family. {ECO:0000256|ARBA:ARBA00007507, ECO:0000256|RuleBase:RU003926}.	Small GTPase superfamily, SAR1 family	MFVCRLPECGQTFVGINVVSEKRNKIAHSLPGILFCRYTTLYTLFVGILVILQSFWNRFLLERSTHYTHPDQYSTACHNEWWCVFTTQKVELTCQCTFPGLYKKSGKLVFLGLDNAGKTTLLHMLKDDRLGQHVPTLHPTSEELTIAGMTFTTFDLGGHVQARRVWKNYLPAINGVVFLVDCADHERLTESKIELDALLADETILSVPVLVLGNKIDRPEAISEGGLREAFVLDGQCTGKGNVSLKDLQARPLEIFMCSVLKKQGYGDGFRWLAQYID
Protein_053	Translation initiation factor eIF2B subunit gamma (eIF2B GDP-GTP exchange factor subunit gamma)	485	SIMILARITY: Belongs to the eIF-2B gamma/epsilon subunits family. {ECO:0000256|ARBA:ARBA00007878}.	EIF-2B gamma/epsilon subunits family	MELQAVLMAAGGGSRMMDLTYNTPKPLLPVGNKPLIWYPLNLLERVGFEEVIVITTKEVQKMISTDPKVKLDVKMKLDLVCIQEDADMGTADALRHIQQKVKTDVLVVSCDLITDAALHEVVDLFRAHNATLSMLMSKAHEFTETVPGQKGKKKTGEQRDFVGVDGTGKRLLFMANEADLDEGVVIRKSIMRKHPRMHIKTGLVDAHLYCLKKSVVDFLADNKSISSIRGELVPYLVRKQFSKSTNSPKVIDETHQNLKKNDKIQISSRDEELLHLTQERSCWNDHRGDMSDAYHGGRLRCYVHIMDEGICYRVNTLAAYIEANRLAPKLFDEPAVHPSAVVSERCLIGADSIIGASCQISDKTSIKRSTIGVSTTVREKVKVTNSIIMHGVTIEEGCN…
Protein_054	Sodium/potassium-transporting ATPase subunit beta	289	SIMILARITY: Belongs to the X(+)/potassium ATPases subunit beta family. {ECO:0000256|ARBA:ARBA00005876, ECO:0000256|RuleBase:RU362099}.	X(+)/potassium ATPases subunit beta family	MATLKEKRTCGQRCEDFGRFVWNSDTGAMFGRTPEKWVYISLYYVAFYVIMTGLFCLAIWTLMYTLDPYTPDYQDRLTSPGVMVWPPTYIEEDVILSYNLSDKTSQRKMSNCLSNFLKPYNDTSQQSNHNCTKGEYFKQEKFEAPHHTKYSCRFTQSMLGRCSGLDDPTFGYNGTTPCVIIKMNRIINFLPNNGTGMAPHLNCTILSGHENIDMIEYFPTNGTFDLSYFPYYGKLAQPTYVNPLVAVKFHLVKEREAKIQCRVVAHNIAYQDSYEPYQGKVVFLLKALK
Protein_055	Sodium/potassium-transporting ATPase subunit alpha	1034	SIMILARITY: Belongs to the cation transport ATPase (P-type) (TC 3.A.3) family. Type IIC subfamily. {ECO:0000256|ARBA:ARBA00006934, ECO:0000256|RuleBase:RU362084}.	Cation transport ATPase (P-type) (TC 3.A.3) family, Type IIC subfamily	MSKGDSYDMFEMNGEVDVKMKKKKKIKKKDRLEGMKKEMDIDDHEITIEELEMRYTTSVTKGLTSSKAAEVLERDGPNELLPPKGTPEYVKFARQLAGGLQCLMWVAAVICFIAFGIEFSRGTLGCFDDLYLAITLITVVVVTGCFGYYQEFKSTNIIASFKNLVPQQALVIRDGQKNQINAMDLVVGDLVEIKGGDRVPADIRIIFAQGCKVDNSSLTGESEPQSKTPECTHENPLETKNIAFFSTTCLEGVATGTVINTGDRTIIGRIASLASGVGNEKTPIAIEIEHFVDIIAGLAIFFGFTFFVVAMFIGYAFLEAMIFFMAIVVAYVPEGLLATVTVCLSLTAKRLARKNCVVKNLEAVETLGSTSVICSDKTGTLTQNRMTVAHLWFDNVIHA…
Protein_056	VWFD domain-containing protein	2277			MSPGVTNSSVAPPLSTTDAEVSPMHNGQVCSTWGNYHFKTFDGDIFQLPSTCNYVVTSLCHSSYEDFNIQMRRQVVDNQPTISKITMKLDGVVVELSKGSVVVNGKNATLPFSQSGILIEETPSYIKIKAKLGLVAIWNQEDSFLVEMDIKFRNKTCGLCGDFNGVQQFDEFYSHGMKLSPVDFGNFWKLDGPTESCTEKTLLSNHKCPNLKPVCEQLLSGPAFSSCKDLLAIDSFVEACVSDLCHCDNSTNSFCLCNTISEYSRQCVHAGGKPQQWRTEQFCYKTCPFNMEYQECGNPCVDTCSNPERGQMCEEHCSDGCFCPPGTVFDDVNKNGCIALSQCSCRHNGKTYAPGESYSSTCKDCSCGGGQWKCVDKDCPGTCAVEGGSHINTYDGKAY…
Protein_057	MHC class II antigen alpha chain	57			VDMYGLDGEEMWYADFNKKEGVMPLPPFADPFTYPGAYEQAVGDQGTCKANLAVNIK
Protein_058	EF-hand domain-containing protein	84			DHLLFNSITMSGKLTKEERANLREMFSHFDKNGDGEISRNELKRGMAEFRQKMSDQKAASMISQCDADCDGRVDFEEFCNMMSH
Protein_059	Heat shock protein 70	170	SIMILARITY: Belongs to the heat shock protein 70 family. {ECO:0000256|ARBA:ARBA00007381}.	Heat shock protein 70 family	TAAAIAYGLDKKAGSGTNVLIFDLGGGTFDVSILSIEDGVFEVKSTAGDVHLGGEDFDTRLVNHFIEEFKRKNKKDISENKRSVRRLRTACERAKRTLSSSATANIEIDSLFEGIDFYSTISRARFEELNADLFRSTLDPVEKALRDAKLSKPEIHDIVLVGGSTRIPKI
