# Supplementary material
Source: Research Square preprint supplement (doi:10.21203/rs.3.rs-9266461/v1)
Supplement: Supplementary file 4 [file 69da21ab34d40b5d61342c22.docx]

## **Lactylation Dynamics in Myxozoan Proteins**

Amr A. G. Ibrahim, Juliana Naldoni, Antônio A. M. Maia, Juliano R. Sangalli, Caroline M. Meira, Rayline T. A. Figueredo, Beth Okamura, Paul F. Long, Edson A. Adriano

# Supplementary File S1

**Material and methods of the Oxford Nanopore Technologies-ONT sequencing of *Myxobolus macroplasmodialis* parasite of the South American bryconid fish *Salminus brasiliensis***

The ONT sequencing of *Myxobolus macroplasmodialis* was obtained from a plasmodium recovered from a specimen of the fish *Salminus brasiliensis* (Bryconidae) caught in the Mogi-Guaçu River, São Paulo State, Brazil (21°55′18″S, 47°20′35″W). Sampling and access to genetic heritage were conducted in accordance with the authorization granted by the Brazilian Ministry of the Environment (SISBIO authorization #67616-8 and SisGen registration #A656D), and the methodology was approved by the Ethics Committee on Animal Use of the Federal University of São Paulo (UNIFESP) (CEUA #7344040422).

After dissection, plasmodia of *M. macroplasmodialis* were removed and preserved in 100% ethanol. One plasmodium was disrupted, and genomic DNA was extracted from its internal content using the DNeasy® Blood & Tissue Kit (Qiagen), following the manufacturer’s protocol. DNA concentration was measured using a Qubit Fluorometer (Thermo Fisher Scientific).

The DNA library was prepared using the Native Barcoding Kit V14 (Oxford Nanopore Technologies) and sequencing was conducted in the Life Sciences Core Facility (LaCTAD) of the State University of Campinas (UNICAMP). Raw FAST5 files were basecalled with Guppy v6.4.6 (super-accurate model: dna_r10.4.1_e8.2_400bps_sup.cfg), which simultaneously generated methylation modification tags (MM tags) via the 5mCG_5hmCG model. Sequencing was performed on a PromethION 2 Solo flow cell, producing an average coverage of 3–4 Gb (data not published). A stringent quality control pipeline was applied, filtering reads to retain only those with a mean quality score ≥7 and a length ≥500 bp. Reads with excessive adapter contamination (>10%) or extreme GC content (<20% or >80%) were discarded. This process yielded a final dataset of 27,691 high-quality reads with a mean length of 8,247 bp and a mean quality score of 12.3.
