# Supplementary material
Source: Research Square preprint supplement (doi:10.21203/rs.3.rs-9266461/v1)
Supplement: Supplementary file 6 [file ea04ee7cb711f72aa2c4913c.docx]

## Lactylation Dynamics in Myxozoan Proteins

Amr A. G. Ibrahim, Juliana Naldoni, Antônio A. M. Maia, Juliano R. Sangalli, Caroline M. Meira, Rayline T. A. Figueredo, Beth Okamura, Paul F. Long, Edson A. Adriano

**Supplementary File S5**

Full results oflactylation sites in myxozoan genomes using the AGAE-Lyzer tool and their reports. And STRING database for a Protein-Protein network among Cnidarian proteins with detected Lactylation.

This supplementary file provides the complete output of lactylation site prediction analyses conducted across myxozoan genomes using the **AGAE-Lyzer** computational framework (Ibrahim & Adriano, 2025), together with downstream protein–protein interaction (PPI) network reconstruction using the **STRING database**. This supplementary dataset is intended to support transparency, reproducibility, and secondary analyses of lactylation-associated regulatory mechanisms in cnidarian parasites.

1. **Lactylation Site Prediction Using AGAE-Lyzer**

AGAE-Lyzer was applied to predicted proteomes from representative myxozoan species to identify lysine residues with high probability of undergoing lactylation. The tool integrates sequence-derived features, physicochemical properties, and machine-learning–based classification to assign confidence scores to individual lysine residues.

The full AGAE-Lyzer output tables provided in this supplement include, for each analyzed protein:

1. protein identifier and annotation,
2. lysine position within the protein sequence, and
3. predicted lactylation status,

These results enable systematic comparison of lactylation patterns across proteins and species, as well as identification of conserved or enriched lactylation hotspots, particularly within histones, stress-response proteins, and metabolic enzymes.

The full results are accessible at: <https://bit.ly/3YH6bwE>

1. **Integration with Protein–Protein Interaction Networks**

To explore the functional context of lactylated proteins, those identified by AGAE-Lyzer were mapped to the **STRING database** to generate a protein–protein interaction network among cnidarian proteins with detected or predicted lactylation. The resulting network highlights both direct and indirect functional associations based on curated databases, co-expression, and predicted interactions.

Network analysis revealed clusters enriched for proteins involved in chromatin organization, transcriptional regulation, protein folding, and metabolic processes, suggesting that lactylation targets functionally connected protein modules rather than isolated proteins. Hub proteins within the network, including histones and molecular chaperones, may represent key regulatory nodes integrating metabolic state with cellular and epigenetic responses.

The interactive STRING network corresponding to this analysis is accessible at:
[**https://bit.ly/4s7owQW**](https://bit.ly/4s7owQW)

References

Ibrahim AGA, Adriano EA. AGAE-Layzer: An in-silico tool for predicting lysine lactylation sites. Version 1. Authorea [Preprint].[posted 2025 Nov 4]. Available from: <https://doi.org/10.22541/au.176222447.78799278/v1>
